1 **Membrane permeabilization is mediated by distinct epitopes in mouse and human**  
2 **orthologs of the necroptosis effector, MLKL**

3

4 Ashish Sethi<sup>1,5</sup>, Christopher R. Horne<sup>2,3,5</sup>, Cheree Fitzgibbon<sup>2</sup>, Karyn Wilde<sup>4</sup>, Katherine A.  
5 Davies<sup>2,3</sup>, Sarah E. Garnish<sup>2,3</sup>, Annette V. Jacobsen<sup>2,3</sup>, André L. Samson<sup>2,3</sup>, Joanne M.  
6 Hildebrand<sup>2,3</sup>, Ahmad Wardak<sup>2</sup>, Peter E. Czabotar<sup>2,3</sup>, Emma J. Petrie<sup>2,3</sup>, Paul R. Gooley<sup>1</sup>, James  
7 M. Murphy<sup>2,3,\*</sup>

8

9 <sup>1</sup> Department of Biochemistry and Pharmacology, Bio21 Molecular Science and  
10 Biotechnology Institute, University of Melbourne, Parkville, VIC 3010, Australia

11 <sup>2</sup> Walter and Eliza Hall Institute of Medical Research, 1G Royal Parade, Parkville, VIC 3052,  
12 Australia

13 <sup>3</sup> Department of Medical Biology, University of Melbourne, Parkville, VIC 3052, Australia

14 <sup>4</sup> National Deuteration Facility, Australian Nuclear Science and Technology Organization,  
15 Lucas Heights, NSW 2234, Australia

16

17 <sup>5</sup> These authors contributed equally

18

19 \* Please address correspondence to JMM (jamesm@wehi.edu.au)

20 **ABSTRACT**

21 Necroptosis is a lytic programmed cell death pathway with origins in innate immunity that is  
22 frequently dysregulated in inflammatory diseases. The terminal effector of the pathway,  
23 MLKL, is licensed to kill following phosphorylation of its pseudokinase domain by the  
24 upstream regulator, RIPK3 kinase. Phosphorylation provokes the unleashing of MLKL's N-  
25 terminal four-helix bundle (4HB or HeLo) domain, which binds and permeabilizes the plasma  
26 membrane to cause cell death. The precise mechanism by which the 4HB domain permeabilizes  
27 membranes, and how the mechanism differs between species, remains unclear. Here, we  
28 identify the membrane binding epitope of mouse MLKL using NMR spectroscopy. Using  
29 liposome permeabilization and cell death assays, we validate K69 in the  $\alpha$ 3 helix, W108 in the  
30  $\alpha$ 4 helix, and R137/Q138 in the first brace helix as crucial residues for necroptotic signaling.  
31 This epitope differs from the phospholipid binding site reported for human MLKL, which  
32 comprises basic residues primarily located in the  $\alpha$ 1 and  $\alpha$ 2 helices. In further contrast to  
33 human and plant MLKL orthologs, in which the  $\alpha$ 3- $\alpha$ 4 loop forms a helix, this loop is  
34 unstructured in mouse MLKL in solution. Together, these findings illustrate the versatility of  
35 the 4HB domain fold, whose lytic function can be mediated by distinct epitopes in different  
36 orthologs.

## 37 INTRODUCTION

38 Necroptosis is a caspase-independent, lytic cell death mode with ancestral origins in host  
39 defense<sup>1, 2, 3, 4, 5, 6, 7, 8, 9</sup>, which is frequently dysregulated in disease<sup>10, 11, 12, 13, 14, 15, 16</sup>. The  
40 inflammatory nature of necroptosis has led to its implication in a range of human pathologies,  
41 including renal<sup>11, 13</sup> and gastrointestinal diseases<sup>14, 17</sup>. Necroptotic signaling is instigated by  
42 ligation of death receptors, such as TNF Receptor 1, or pathogen detectors, such as ZBP1/DAI,  
43 in cellular contexts where the IAP E3 Ubiquitin ligase family and the proteolytic enzyme,  
44 Caspase-8, are downregulated or their catalytic activities compromised (reviewed in ref.<sup>18</sup>).  
45 Downstream of receptor activation, a cytoplasmic platform termed the necrosome is assembled  
46 in which the Receptor-interacting serine/threonine protein kinase (RIPK)-1 recruits RIPK3,  
47 leading to its activation by autophosphorylation<sup>1, 19, 20, 21, 22</sup>. Subsequently, RIPK3  
48 phosphorylates the pseudokinase domain of the necroptotic executioner, Mixed lineage kinase  
49 domain-like (MLKL)<sup>23, 24</sup>, to induce its dissociation from the necrosome<sup>25, 26, 27</sup>, assembly into  
50 high molecular weight complexes<sup>27, 28, 29</sup>, and trafficking to the plasma membrane<sup>18, 27, 30</sup>. When  
51 a threshold level of activated MLKL accumulates at the plasma membrane<sup>27, 30</sup>, MLKL perturbs  
52 the lipid bilayer to cause cell death via an incompletely understood mechanism<sup>31</sup>. This mode  
53 of cell death involves the leakage of cellular contents, including DAMPs, into the extracellular  
54 milieu to provoke an inflammatory response<sup>32</sup>.

55  
56 While the core principles of necroptotic signaling and MLKL activation are preserved between  
57 species, the precise molecular mechanisms appear to differ. Detailed studies of the  
58 pseudokinase domains of MLKL orthologs have revealed their propensity to adopt distinct  
59 conformations<sup>23, 29, 33, 34, 35</sup>, which governs recognition by RIPK3 and results in very strict  
60 species specificity<sup>36, 37</sup>. Additionally, the role of activation loop phosphorylation in triggering  
61 MLKL activation appears to vary between orthologs. Phosphorylation serves as a trigger for  
62 release of the killer 4HB domain in mouse MLKL<sup>23, 28, 38, 39</sup>, as a cue for MLKL release from  
63 the necrosome and interconversion to the closed, active form in human MLKL<sup>25, 26, 29, 34</sup>, and a  
64 likely role in negating occupation of the pseudoactive site in horse MLKL<sup>33</sup>. Consistent with  
65 the diverse regulatory mechanisms governing the MLKL pseudokinase domain molecular  
66 switch, the N-terminal executioner 4HB domain exhibits heterogeneous membrane  
67 permeabilization between species<sup>37</sup>. However, the molecular basis for how and why  
68 recombinant mouse MLKL 4HB domain more efficiently permeabilizes lipid bilayers than the  
69 human and chicken 4HB domains has remained unclear.

70

71 NMR studies of human MLKL's 4HB domain over the past 7 years have provided important  
72 insights into the residues involved in phospholipid headgroup and inositol phosphate  
73 recognition<sup>40, 41, 42, 43</sup>. These studies have implicated basic residues located principally within  
74 the  $\alpha 1$  and  $\alpha 2$  helices in negatively-charged phospholipid binding<sup>42, 43</sup>, while inositol  
75 phosphate recognition relies on an epitope centred on the loop connecting the  $\alpha 2$  and  $\alpha 3$   
76 helices, and the  $\alpha 1$  helix, including lipid binding residues<sup>40, 41</sup>. Considering the low sequence  
77 identity between human and mouse MLKL 4HB domains<sup>33, 44</sup>, we employed NMR  
78 spectroscopy to define the residues that mediate lipid recognition in mouse MLKL and to  
79 identify structural differences from its human counterpart. Remarkably, in NMR relaxation  
80 experiments, we identified residues on the opposing face of the mouse MLKL 4HB domain,  
81 relative to those implicated in human MLKL lipid and inositol phosphate recognition, as  
82 mediators of liposome binding. Mutation of these residues compromised liposome  
83 permeabilization *in vitro*, with a subset of these sites found to be functionally crucial for mouse  
84 MLKL necroptotic signaling in cells. Collectively, these data illustrate that mouse and human  
85 MLKL rely on distinct lipid-binding residues to enact cell death and support the idea that the  
86 4HB (also known as HeLo) domain can serve as a versatile scaffold for lipid recognition and  
87 permeabilization.



## 88 RESULTS

89

### 90 Mouse MLKL 4HB domain adopts a folded helical structure

91 To characterize the structure of N-terminal four-helix bundle (4HB) domain and the first brace  
92 helix of mouse MLKL (residues 1-158; termed mouse MLKL<sub>(1-158)</sub> herein) in solution, we  
93 subjected <sup>2</sup>H,<sup>15</sup>N,<sup>13</sup>C-labelled protein to non-uniformly sampled three-dimensional NMR  
94 methodology. As previously, mouse MLKL<sub>(1-158)</sub> purified as a monomer, owing to the absence  
95 of the second brace helix that is required for trimerization<sup>36</sup>. From these 3D NMR experiments,  
96 we could successfully assign 95% of the backbone resonances corresponding to residues 1-158  
97 of mouse MLKL (**Figure 1a**), with additional backbone amides corresponding to the vector-  
98 encoded remnant sequence (GAMGS) also observed (numbered as residues -4 to 0 in **Figure**  
99 **1b-c**). As anticipated from the crystal structure of full-length mouse MLKL, the 4HB domain  
100 (residues 1-125) and the adjacent brace helix 1 exhibited predominantly positive  $\Delta C\alpha-\Delta C\beta$   
101 smoothed values (**Figure 1b**), which is consistent with the expected helical structure. In  
102 contrast, the region corresponding to the S82 to G91 backbone amides exhibited trends to both  
103 negative and positive  $\Delta C\alpha-\Delta C\beta$  values ( $\Delta C\alpha-\Delta C\beta < \pm 1.0$ ), indicating a lack of regular  
104 secondary structure in this region. Interestingly, the overlapping region encompassing S79 to  
105 K94 could not be modelled in the mouse MLKL crystal structure due to lack of electron  
106 density<sup>23, 45</sup>, consistent with it occurring as an unstructured loop. To further investigate the  
107 internal dynamics within the mouse MLKL 4HB domain structure in solution, we recorded a  
108 steady state <sup>15</sup>N{<sup>1</sup>H}NOE experiment<sup>46</sup> on <sup>15</sup>N-labelled mouse MLKL<sub>(1-158)</sub> (**Figure 1b**). The  
109 average <sup>15</sup>N{<sup>1</sup>H}-NOE values ( $0.82 \pm 0.07$ ) for mouse MLKL (residues D2-V150) support the  
110 existence of the mouse MLKL 4HB domain and adjacent brace helix occurring in solution as  
111 a structured protein with flexible termini (vector encoded residues -4 to 0 and residues 151-  
112 158, average <sup>15</sup>N{<sup>1</sup>H}-NOE values  $< 0.5$ ). For the region S79 to K94, which corresponds to  
113 the loop connecting the  $\alpha 3$  and  $\alpha 4$  helices in the mouse MLKL crystal structure, an average  
114 <sup>15</sup>N{<sup>1</sup>H}-NOE value of ( $0.62 \pm 0.05$ ) was recorded. These data are consistent with this loop  
115 exhibiting higher flexibility than the remaining mouse MLKL 4HB+brace core structure.

116

### 117 Two clusters mediate mouse MLKL 4HB+brace binding to liposomes

118 Studies of the human MLKL 4HB domain by NMR spectroscopy have identified principally  
119 basic residues as the mediators of lipid binding, lipid permeabilization and cell death<sup>42, 43</sup>.  
120 While analogous studies have not been performed to date on mouse MLKL 4HB domain, very

121 few of the key residues within human MLKL are conserved in the mouse ortholog.  
122 Accordingly, we sought to deduce which mouse MLKL 4HB domain residues mediate lipid  
123 binding, and whether they spatially differ to the reported lipid-binding residues in the human  
124 MLKL 4HB domain, by performing a 2D  $^1\text{H}$ - $^{15}\text{N}$  HSQC monitored titration of uniformly  $^{15}\text{N}$ -  
125 labeled mouse MLKL<sub>(1-158)</sub> with liposomes of a plasma membrane-like composition. Using this  
126 approach, we identified two clusters of residues in mouse MLKL that exhibited marked  
127 attenuation of peak intensity (**Figure 2a-b**). Diminished peak intensity is a sensitive means of  
128 detecting the engagement of different sites within the mouse MLKL 4HB+brace protein with  
129 liposomes, which enables each individual backbone amide resonance to serve as a probe to  
130 report changes in their solvent exposure, motions and interactions. Among these two clusters,  
131 cluster I comprised R34-Q40 in the  $\alpha 2$  helix and D106-E110 in the neighboring  $\alpha 4$  helix; and  
132 cluster II was composed of V67-A71 in the  $\alpha 3$  helix, N92-N101 in the  $\alpha 4$  helix and preceding  
133 region, and D136-D139 in brace helix 1 (**Figure 2b**). We further validated clusters I and II as  
134 liposome interacting sites in mouse MLKL using a  $^{15}\text{N}$  amide spin transverse relaxation ( $^{15}\text{N}$ -  
135  $R_2$ ) experiment at 70.9 MHz for mouse MLKL<sub>(1-158)</sub> in the presence and absence of liposome  
136 in the ratio 1:0.5 (mouse MLKL:liposome) at 25 °C (**Figure 2c**). As expected, in the presence  
137 of liposomes, the  $^{15}\text{N}$ - $R_2$  values for regions clusters I and II within mouse MLKL<sub>(1-158)</sub> (**Figure**  
138 **2c**) showed a marked increase, reflecting the chemical exchange on a fast timescale with  
139 liposomes. Collectively, these data confirm roles for sites clustered on the centre of  $\alpha 2$  and  $\alpha 4$   
140 helices (cluster I) and the N-terminal ends of the  $\alpha 4$  helix and the flanking  $\alpha 3$  and brace helices  
141 (cluster II) in liposome binding, suggesting liposome engagement is mediated via an extended  
142 interface (**Figure 2b**).

143

#### 144 **Membrane binding residues contribute to liposome permeabilization**

145 We next sought to examine whether individual substitutions of sites identified as liposome  
146 interactors in NMR spectroscopy experiments would impact liposome permeabilization. To  
147 this end, we introduced Ala substitutions to H36 ( $\alpha 2$  helix), K69 ( $\alpha 3$  helix), N92, H98, W108  
148 ( $\alpha 4$  helix and preceding region) and R137/Q138 (brace helix 1) (**Figure 3a**) in mouse MLKL<sub>(1-</sub>  
149 <sub>158)</sub> (**Figure 3b-c**) and prepared recombinant proteins for *in vitro* dye release assays. These  
150 residues were selected because they comprise the solvent-exposed sites in clusters I and II  
151 when mapped to the mouse MLKL crystal structure<sup>23</sup>. We reasoned that shifts observed for  
152 adjacent hydrophobic core residues were likely a secondary effect of their proximity to lipid-  
153 binding residues and therefore did not mutate core residues to avoid disrupting 4HB domain

154 folding. In these assays, liposomes loaded with the self-quenching dye, 5(6)-  
155 carboxyfluorescein, were incubated with 8  $\mu$ M recombinant mouse MLKL<sub>(1-158)</sub> and dye  
156 release measured spectrophotometrically. While wild-type mouse MLKL<sub>(1-158)</sub> permeabilized  
157 liposomes with comparable kinetics to previous studies<sup>36, 37</sup>, alanine substitutions of sites  
158 identified as liposome binding residues in NMR experiments led to dampened permeabilization  
159 of liposomes in all cases except N92A (**Figure 3d-e**). Notably, alanine substitution of the  
160 neighbouring residues, H98 and R137/Q138, within cluster II compromised liposome  
161 permeabilization most severely. These data validate residues located on the  $\alpha$ 2,  $\alpha$ 3 and  $\alpha$ 4  
162 helices and the first brace helix as liposome interactors, which individually likely contribute to  
163 membrane permeabilization. It is noteworthy that the introduction of individual mutations into  
164 mouse MLKL<sub>(1-158)</sub> did not lead to complete abrogation of liposome permeabilization, as  
165 expected based on earlier studies of the human MLKL ortholog<sup>43, 47</sup>. As in human MLKL, we  
166 expect that residues on mouse MLKL<sub>(1-158)</sub> act collectively to mediate lipid binding and bilayer  
167 permeabilization, and as such, there is some redundancy between lipid-interacting residues  
168 within the domain.

169

### 170 **Residues in the $\alpha$ 3 helix, $\alpha$ 4 helix, and in the first brace mediate necroptotic signaling**

171 Having identified residues that compromise liposome permeabilization by recombinant mouse  
172 MLKL<sub>(1-158)</sub>, we next introduced Ala substitutions of each liposome binding residue into  
173 constructs encoding full-length mouse MLKL (**Figure 4a**). We stably introduced wild-type  
174 and mutant MLKL into *Mkl1*<sup>-/-</sup> Mouse Dermal Fibroblast (MDF) cells via a doxycycline-  
175 inducible lentiviral system. Following doxycycline treatment to induce expression (**Supp. Fig.**  
176 **1**), we examined the cellular response to the necroptotic stimulus, TSI (Tumor necrosis factor  
177 (TNF, T); Smac mimetic, Compound A (S); and the pan-caspase inhibitor, emricasan/IDN-  
178 6556 (I)<sup>25, 36, 48</sup>) using IncuCyte live cell imaging. The capacity of each MLKL construct to  
179 reconstitute the necroptotic signaling pathway was measured by quantifying SYTOX Green  
180 uptake, as a measure of cell death, relative to the total number of cells stained by cell-permeable  
181 DNA probe, SPY620. Importantly, expression of full-length wild-type mouse MLKL  
182 successfully restored sensitivity to the necroptotic stimulus, TSI, resulting in ~80% cell death  
183 at 5 h post-TSI stimulation (**Figure 4b**). Comparable necroptotic cell death kinetics were also  
184 observed for the mutant MLKL constructs, H36A, N92A and H98A, indicating that,  
185 individually, these residues do not impact necroptotic signaling (**Figure 4b; Supplementary**  
186 **Fig. 2a-c**). In contrast, alanine substitution of K69, W108 and R137/Q138 markedly reduced

187 cell death relative to wild-type MLKL, demonstrating that substitution of these residues  
188 attenuates necroptotic signaling (**Figure 4b-c; Supplementary Fig. 2d-f**). We further  
189 validated these differences in cell death between MLKL constructs in an orthogonal assay by  
190 quantifying the release of lactate dehydrogenase (LDH) that arises from plasma membrane  
191 lysis following TSI stimulation (**Figure 4d**). Consistent with necroptotic cell death monitored  
192 by IncuCyte imaging, the LDH release values identified K69, W108 and R137/Q138 located  
193 on the  $\alpha 3$ ,  $\alpha 4$  helices and the first brace helix, respectively, as functionally crucial for mouse  
194 MLKL necroptotic signaling.

195

196 MLKL binds to membranes once it has been phosphorylated by RIPK3<sup>28, 39, 49, 50</sup>. Consistent  
197 with this notion, mutation of the surface-exposed residues in clusters I and II did not have a  
198 major influence on the phosphorylation of RIPK3 or MLKL upon TSI-stimulation (**Figure 4e**).  
199 Importantly, we observed the presence of phosphorylated MLKL and RIPK3 in wild-type and  
200 all mutant MLKL constructs after TSI-treatment (1.5 or 3 h), indicating that our cellular  
201 findings are not attributable to compromise of an upstream necroptosis pathway checkpoint.  
202 We noted that while RIPK1 was detected under basal conditions for all cell lines in our  
203 immunoblots, RIPK1 was not detectable following TSI-stimulation in all conditions, which we  
204 attribute to compromised detection following the post-translational modifications that  
205 accompany necroptotic stimulation<sup>21</sup>, as previously reported<sup>49</sup>. It is notable that K69A, W108A  
206 and R137A/Q138A MLKL were expressed at lower levels than most constructs, following  
207 doxycycline treatment (**Figure 4e**). However, because these mutant MLKL proteins were  
208 expressed at an equivalent level to H36A MLKL, which exhibited comparable cell death  
209 kinetics to wild-type MLKL, any deficits in necroptotic signaling are not a consequence of  
210 lower protein expression. We used a mouse MLKL pseudokinase domain-specific antibody to  
211 detect MLKL expression (WEHI clone 5A6<sup>49</sup>), which ensures any differences in detection  
212 reflect levels, rather than altered reactivity that might arise from using the brace region-directed  
213 antibody (WEHI clone 3H1<sup>23</sup>).

## 214 DISCUSSION

215 Over the past five years, it has emerged that MLKL orthologs exhibit differing propensities to  
216 permeabilize lipid bilayers and thus to enact cell death. While our understanding of the  
217 divergent activation and regulatory mechanisms among the pseudokinase domains of MLKL  
218 orthologs has been greatly enhanced by detailed structural studies<sup>23, 29, 34, 35</sup>, knowledge of  
219 differences between their membrane-permeabilizing executioner domain, the N-terminal four-  
220 helix bundle (4HB) domain, is limited. Distinctions between human and mouse MLKL 4HB  
221 domains are evident from their sequences, with only 52% identity at the amino acid level, and  
222 here we sought to further understand differences at the mechanistic level using a combination  
223 of NMR spectroscopy, biochemical and cellular assays.

224  
225 Our NMR spectroscopy experiments validated that the mouse MLKL 4HB and first brace helix  
226 adopts a folded helical structure in solution, consistent with the fold observed in the crystal  
227 structure of full-length mouse MLKL<sup>23</sup>. In keeping with the full-length mouse MLKL crystal  
228 structure, we did not observe consistent positive  $\Delta C\alpha-\Delta C\beta$  values for residues within the loop  
229 connecting the  $\alpha 3$  and  $\alpha 4$  helices, indicating that this loop does not form a helix. Indeed, the  
230 reduced  $^{15}\text{N}\{^1\text{H}\}$ -NOE values in this loop (relative to the domain overall) supports the assertion  
231 that the loop is flexible, as originally proposed based on the lack of density for this region in  
232 the full-length mouse MLKL crystal structure<sup>23</sup>. This contrasts the human MLKL 4HB domain  
233 NMR<sup>41, 43, 51</sup> and crystal structures<sup>30, 51</sup>, where the loop connecting the  $\alpha 3$  and  $\alpha 4$  helices forms  
234 a helix, which is the target of the covalent MLKL inhibitor, NSA<sup>24</sup>. Interestingly, like human,  
235 but in contrast to mouse, MLKL 4HB domain structures, the recent cryo-EM structure of a  
236 plant MLKL ortholog, which is believed to have arisen via convergent evolution, revealed a  
237 helix in the loop connecting the  $\alpha 3$  and  $\alpha 4$  helices of the 4HB domain<sup>52</sup>.

238  
239 Using NMR relaxation experiments, we then implicated two clusters of residues as lipid  
240 interactors by titrating the N-terminal helical region of mouse MLKL with liposomes that  
241 emulated a plasma membrane composition. Importantly, we chose to examine a monomeric  
242 form of the mouse MLKL (residues 1-158; 4HB domain and first brace helix)<sup>36</sup> in our NMR  
243 experiments, which allows us to attribute any resonance broadening in titrations to liposome  
244 binding, and not oligomerization events. Broadly, the identified sites are spatially-proximal to  
245 those identified as key mediators of necroptotic signaling in our earlier cellular studies of  
246 mouse MLKL<sup>28, 37</sup> (**Figure 5a-b; Supplementary Table 1**). However, whether the arising

247 defects in cell signaling were attributable to deficits in lipid recognition, or other impacts on  
248 necroptotic checkpoints, had not been formally examined. Here, we add to current knowledge  
249 by establishing roles for mouse MLKL K69 ( $\alpha$ 3 helix), W108 ( $\alpha$ 4 helix) and R137/Q138 (first  
250 brace helix) in liposome permeabilization in dye release assays and necroptotic signaling in  
251 reconstituted *Mlkl*<sup>-/-</sup> MDF cells. Our finding that, despite deficits in signaling, these MLKL  
252 constructs and the upstream regulator, RIPK3, were phosphorylated following necroptotic  
253 stimulation indicates that mouse MLKL can still undergo RIPK3-mediated phosphorylation  
254 via the proposed transient “kiss and run” mechanism<sup>23, 26, 28, 45</sup>. These data support the notion  
255 that the loss-of-function mutations identified here arise as a consequence of compromised lipid  
256 recognition and membrane permeabilization downstream of RIPK3 interaction.

257  
258 By mapping the crucial residues for necroptotic signaling identified herein, and from earlier  
259 studies<sup>28, 37</sup>, on to the mouse MLKL 4HB domain+brace structure, it emerges that the lipid-  
260 binding epitope is centered on the  $\alpha$ 3- $\alpha$ 4 helical face of mouse MLKL (**Figure 5b**).  
261 Importantly, this differs from the epitope in human MLKL, which is located on the opposing  
262  $\alpha$ 1- $\alpha$ 2 helical face of the 4HB domain (**Figure 5a, c**), as deduced from a combination of NMR  
263 spectroscopy, liposome permeabilization assays and cell death assays<sup>29, 42, 43, 47</sup>. In contrast to  
264 mouse MLKL, the implicated residues in human MLKL lipid interaction and membrane  
265 permeabilization are typically positively-charged (**Figure 5a, c; Supplementary Table 2**).  
266 While no studies have been performed on the capacity of mouse MLKL 4HB domain to engage  
267 inositol phosphates to date, it is notable that, again, positively charged residues within the  
268 human MLKL 4HB domain have been attributed functions in inositol phosphate binding.  
269 Although the sites of lipid engagement employed by the 4HB domain of plant MLKL are  
270 currently unknown<sup>52</sup>, it is notable that basic residues are largely absent from regions  
271 corresponding to binding residues within human MLKL. In our study of mouse MLKL, we  
272 used a plasma membrane-like lipid cocktail (**Supplementary Table 4**) to prepare unilamellar  
273 vesicles termed liposomes for our NMR titrations. On the other hand, studies of human MLKL  
274 have typically used isolated, highly negatively-charged phospholipid headgroups or inositol  
275 phosphates<sup>40, 41, 42</sup>, which may favour binding to positive sites on the human MLKL 4HB  
276 domain. Additionally, the inositol phosphate binding epitope overlaps that of the lipid-binding  
277 epitope and, as a result, this poses challenges for ascribing clear functions for inositol  
278 phosphates in regulating necroptotic signaling in cells. The precise function of inositol

279 phosphates as modulators of necroptosis, and whether a similar regulatory function is conferred  
280 upon mouse MLKL, remains of outstanding interest.

281

282 Collectively, our findings uncover distinct species-dependent differences in lipid recognition  
283 between mouse and human MLKL. This plasticity illustrates the role of the HeLo/4HB domain  
284 as a scaffold for lipid engagement and permeabilization. Importantly, this work provides  
285 invaluable insight into how MLKL mediates necroptotic cell death and establishes a platform  
286 for future high-resolution structural studies in membranes to address the precise mechanism by  
287 which MLKL permeabilizes membranes.



288 **ACKNOWLEDGEMENTS**

289 We thank the NMR facility (University of Melbourne), which is enabled by an Australian  
290 Research Council equipment grant LE120100022. We are grateful to the National Health and  
291 Medical Research Council for fellowship (J.M.H., 1142669; P.E.C., 1079700; J.M.M.,  
292 1105754, 1172929), grant (1057905; 1124735, 2002965) and infrastructure (IRIISS 9000653)  
293 support; and the Victorian Government Operational Infrastructure Support scheme. We  
294 acknowledge Australian Government Research Training Program Stipend Scholarships  
295 support (to SEG and AVJ) and the Wendy Dowsett Scholarship (to SEG). The National  
296 Deuteration Facility is partly funded by the National Collaborative Research Infrastructure  
297 Strategy (NCRIS), an Australian Government initiative.

298

299 **AUTHOR CONTRIBUTIONS**

300 AS and CRH designed and performed experiments, analysed data and co-wrote the paper with  
301 JMM; KW carried out the biodeuteration of the recombinant protein for NMR; CF, KAD, SEG,  
302 AVJ, ALS, JMH and AW performed experiments and analysed data; PEC, EJP, PRG and JMM  
303 supervised the project and contributed to experimental design and data analysis. All authors  
304 commented on the manuscript.

305

306 **COMPETING INTERESTS**

307 CF, KAD, SEG, ALS, JMH, PEC, EJP and JMM contribute to, or have contributed to, a project  
308 with Anaxis Pharma to develop necroptosis inhibitors. The remaining authors declare no  
309 conflicts of interest.



## 310 METHODS

311 **Expression constructs.** For expression in mammalian cells, wild-type full-length MLKL was  
312 amplified by PCR from a mouse MLKL template (synthesised by DNA2.0, CA) and ligated  
313 into the doxycycline-inducible, puromycin-selectable mammalian expression vector, pF  
314 TRE3G PGK puro (Amp<sup>r</sup>) using BamHI and EcoRI restriction sites, as before<sup>23</sup>. Mutant mouse  
315 MLKL cDNAs were synthesized and subcloned into pF TRE3G PGK puro as BamHI-EcoRI  
316 fragments by ATUM (CA). Vector DNA was co-transfected into HEK293T cells with pVSVg  
317 and pCMV ΔR8.2 helper plasmids to generate lentiviral particles, which were transduced into  
318 three biologically independent Mouse Dermal Fibroblast (MDF) cell lines (*Mkl1*<sup>-/-</sup>, derived  
319 from different mice using a previously described method<sup>23</sup>) and selected for genomic  
320 integration using puromycin (2.5 μg mL<sup>-1</sup>; StemCell Technologies) using established  
321 procedures<sup>28, 36</sup>. For recombinant protein constructs, wild-type mouse MLKL<sub>(1-158)</sub> was  
322 amplified by PCR from the mouse MLKL template and subcloned into the bacterial expression  
323 vector pETNusH Htb (Kan<sup>r</sup>) (derived from pETM60)<sup>53, 54</sup> as an in-frame fusion with a TEV  
324 (tobacco etch virus) protease-cleavable NusA-His<sub>6</sub> tag. Mutant mouse MLKL<sub>(1-158)</sub> constructs  
325 were amplified by PCR from the respective pF TRE3G PGK puro constructs (ATUM, CA) and  
326 subcloned into pETNusH Htb as BamHI-EcoRI fragments. All insert sequences were verified  
327 by Sanger sequencing (AGRF, VIC, Australia). All primers used in this study are listed in  
328 [Supplementary Table 3](#).

329  
330 **Biodeuteration and protein expression of mouse MLKL<sub>(1-158)</sub>.** Uniformly <sup>15</sup>N-labelled ([U-  
331 <sup>15</sup>N]), <sup>13</sup>C<sup>15</sup>N-labelled [U-<sup>13</sup>C,<sup>15</sup>N] and fractional deuterated (f-<sup>2</sup>H) [U-<sup>13</sup>C, <sup>15</sup>N]-labelled  
332 recombinant mouse MLKL<sub>(1-158)</sub> was expressed via the pETNusH Htb vector at the National  
333 Deuteration Facility (NDF), Australian Nuclear Science and Technology Organization  
334 (ANSTO) in 1 L batch cultures using an established high cell density protocol<sup>55</sup>.

335  
336 Briefly, for the [U-<sup>15</sup>N]- and [U-<sup>13</sup>C,<sup>15</sup>N]-labelled mouse MLKL<sub>(1-158)</sub> constructs, 300 μL of  
337 freshly transformed *E. coli* BL21Star™(DE3) cells were inoculated into 10 mL of H<sub>2</sub>O ModC1  
338 minimal medium, supplemented with kanamycin (40 μg L<sup>-1</sup>) and incubated overnight at 30 °C  
339 shaking at 220 rpm. The cell suspensions were diluted 5x in <sup>1</sup>H, <sup>15</sup>N-ModC1 medium (40 g/L  
340 glycerol, 5.16 g/L <sup>15</sup>NH<sub>4</sub>Cl ≥ 98 atom % <sup>15</sup>N) or <sup>1</sup>H, <sup>13</sup>C, <sup>15</sup>N-ModC1 medium (20 g/L glycerol-  
341 <sup>13</sup>C<sub>3</sub> 99 atom % <sup>13</sup>C, 5.16 g/L <sup>15</sup>NH<sub>4</sub>Cl ≥ 98 atom % <sup>15</sup>N) and grown at 37 °C for two OD<sub>600</sub>  
342 doublings, respectively for the [U-<sup>15</sup>N]) and [U-<sup>13</sup>C,<sup>15</sup>N] labelled constructs. Finally, cells were  
343 inoculated into fresh <sup>1</sup>H, <sup>15</sup>N-ModC1 to a volume of 100 mL and grown to an OD<sub>600</sub> of 0.9-1.2

344 before inoculation into 900 mL of labelled expression medium (as described above) in a 1 L  
345 working volume bioreactor. *E. coli* cells were grown at 25 °C until OD<sub>600</sub> of ~9.5 and  
346 expression was induced by addition of isopropylthio-β-D-galactopyranoside (IPTG) at a final  
347 concentration of 1 mM. After ~24 h induction at 20 °C, during which a further 5.16 g of  
348 <sup>15</sup>NH<sub>4</sub>Cl was added to the culture, each labelled cell suspension was pelleted by centrifugation  
349 at 8000×g for 20 min and each biomass stored at -80 °C.

350

351 Briefly, a three step deuterated minimal medium adaptation process was followed for the (f-  
352 <sup>2</sup>H) [U-<sup>13</sup>C, <sup>15</sup>N]-labelled mouse MLKL<sub>(1-158)</sub> construct starting with 300 μL of freshly  
353 transformed *E. coli* BL21Star™(DE3) cells inoculated into 10 mL of 50% deuterium oxide  
354 (D<sub>2</sub>O) (v/v) ModC1 minimal medium (20 g/L glycerol) with 40 μg L<sup>-1</sup> kanamycin and  
355 incubated overnight at 37 °C with shaking at 220 rpm. The resulting cell suspension was diluted  
356 5-fold in <sup>2</sup>H, <sup>13</sup>C, <sup>15</sup>N-ModC1 medium (D<sub>2</sub>O 99.8 atom % D, 20 g/L glycerol-<sup>13</sup>C<sub>3</sub> 99 atom %  
357 <sup>13</sup>C, 5.16 g/L <sup>15</sup>NH<sub>4</sub>Cl ≥ 98 atom % <sup>15</sup>N) and grown at 37 °C for approximately one OD<sub>600</sub>  
358 doubling. Finally, cells were inoculated into fresh <sup>2</sup>H, <sup>13</sup>C, <sup>15</sup>N-ModC1 to a volume of 100 mL  
359 and grown to an OD<sub>600</sub> of 1.1 before inoculation into 900 mL of labelled expression medium  
360 as described in a 1 L working volume bioreactor. *E. coli* cells were grown at 37 °C until OD<sub>600</sub>  
361 reached 8.2 and expression induced by addition of IPTG at a final concentration of 1 mM. After  
362 26 h induction at 20 °C, during which a further 5.16 g of <sup>15</sup>NH<sub>4</sub>Cl was added to the culture, the  
363 labelled cell suspension was pelleted by centrifugation at 8000×g for 20 min and biomass  
364 stored at -80 °C.

365

366 ***Protein expression of unlabelled mouse MLKL (1-158).*** Mouse MLKL<sub>(1-158)</sub> constructs with  
367 in-frame TEV protease cleavable N-terminal NusA-His<sub>6</sub> tags (pETNusH Htb) were expressed  
368 in *E. coli* BL21-Codon Plus (DE3)-RIL cells cultured in Super Broth supplemented with  
369 kanamycin (50 μg mL<sup>-1</sup>) at 37°C with shaking at 220 rpm to an OD<sub>600</sub> of ~0.6-0.8. Protein  
370 expression was induced by the addition of IPTG (final concentration of 1 mM) and the  
371 temperature was lowered to 18 °C for incubation overnight. Following protein expression, the  
372 cell suspension was pelleted by centrifugation at 8000×g for 20 min and biomass stored at -80  
373 °C.

374

375 ***Recombinant protein purification.*** For liposome permeabilization assays, cell pellets of mouse  
376 MLKL<sub>(1-158)</sub> were resuspended in wash buffer [20 mM Tris-HCl (pH 8.0), 500 mM NaCl, 5  
377 mM imidazole (pH 8.0), 20% glycerol, 1 mM TCEP [Tris-(2-carboxyethyl)phosphine],

378 supplemented with Complete protease inhibitor cocktail (Roche), and lysed by sonication. The  
379 whole cell lysate was clarified by centrifugation (45,000×g, 1 h, 4 °C), filtered (0.2 µM) and  
380 the supernatant was incubated with pre-equilibrated Ni-NTA agarose (HisTag, Roche) at 4 °C  
381 for 1 h with gentle agitation. Ni-NTA beads were then pelleted via centrifugation and washed  
382 thoroughly with wash buffer. Bound protein was eluted from the beads using elution buffer [20  
383 mM Tris-HCl (pH 8.0), 500 mM NaCl, 250 mM imidazole (pH 8.0), 20% glycerol, 1 mM  
384 TCEP], filtered through a 0.45-µm filter, mixed with 300 µg of recombinant His<sub>6</sub>-TEV and  
385 dialysed overnight in size exclusion buffer [20 mM Tris-HCl (pH 8.0), 150 mM NaCl, 1 mM  
386 TCEP], supplemented with 5% glycerol at 4 °C. Following protease cleavage, the dialysate  
387 was further purified using Ni-NTA chromatography to eliminate uncut material, cleaved NusA  
388 and the TEV protease. The flowthrough containing the mouse MLKL<sub>(1-158)</sub> construct was  
389 concentrated via centrifugal ultrafiltration (10 kDa molecular weight cut-off; Millipore) and  
390 loaded onto a Superdex 75 Increase 10/300 GL size exclusion column (Cytiva) equilibrated in  
391 size exclusion buffer. Protein purity was assessed by SDS-PAGE (**Fig. 3c**). Protein that was  
392 not immediately used in experiments was aliquoted, flash-frozen in liquid nitrogen and stored  
393 at -80 °C.

394  
395 For NMR experiments, cell pellets of [U-<sup>15</sup>N]-, [U-<sup>13</sup>C,<sup>15</sup>N]- and (f-<sup>2</sup>H) [U-<sup>13</sup>C, <sup>15</sup>N]-labelled  
396 mouse MLKL<sub>(1-158)</sub> were resuspended in low imidazole buffer [20 mM HEPES (pH 7.5), 200  
397 mM NaCl, 5% v/v glycerol, 35 mM imidazole (pH 7.5), 1 mM TCEP], supplemented with  
398 Complete protease cocktail inhibitor (Roche), and lysed by sonication. The whole cell lysate  
399 was clarified by centrifugation (45,000×g, 1 h, 4 °C), filtered (0.2 µM) and the supernatant was  
400 loaded onto a HisTrap FF 5 ml column (Cytiva) pre-equilibrated with low imidazole buffer at  
401 4 °C. After washing in low imidazole buffer, the bound protein was eluted using high imidazole  
402 buffer [20 mM HEPES (pH 7.5), 200 mM NaCl, 5% v/v glycerol, 375 mM imidazole (pH 7.5),  
403 1 mM TCEP]. The eluant was further purified by cleaving the NusA-His<sub>6</sub> tag by incubating  
404 with TEV protease, dialysis overnight in size exclusion buffer [20 mM HEPES (pH 7.5), 200  
405 mM NaCl, 1 mM TCEP] and a second round of HisTrap-chromatography to eliminate uncut  
406 material, cleaved NusA and the TEV protease. The flowthrough was concentrated via  
407 centrifugal ultrafiltration (10 kDa molecular weight cut-off; Millipore) and loaded onto a  
408 Superdex 75 Increase 10/300 GL size exclusion column (Cytiva) equilibrated in NMR size  
409 exclusion buffer [20 mM HEPES (pH 6.8), 100 mM NaCl, 1 mM TCEP]. Protein purity was  
410 assessed by SDS-PAGE and then used fresh for each NMR experiment.

411

412 ***NMR samples and NMR Spectroscopy.*** NMR experiments were all performed at 25 °C on a  
413 700-MHz Bruker Avance HDIII spectrometer equipped with triple resonance cryoprobe.  
414 Proteins samples were prepared in a buffer containing 20 mM HEPES, 100 mM NaCl and 1  
415 mM TCEP at pH 6.8 supplemented with 10% <sup>2</sup>H<sub>2</sub>O. Backbone resonances (<sup>13</sup>C<sub>α</sub>, <sup>13</sup>C<sub>β</sub>, <sup>13</sup>C',  
416 <sup>15</sup>N and NH) of residues were assigned from 3D HNCACB, HN(CO)CACB, HNC(O) and  
417 HNCA experiments using non-uniform sampling (NUS). For NUS, sampling schedules were  
418 generated using Poisson gap sampler with 10% of the total number of points collected for all  
419 the 3D NMR experiments<sup>56</sup>. Spectra were reconstructed with compressed sensing algorithm  
420 using qMDD<sup>57</sup> and processed using NMRPipe<sup>58</sup> and data analyzed in NMRFAM-SPARKY<sup>59</sup>.  
421 The <sup>1</sup>H chemical shifts were referenced directly to DSS at 0 ppm and the <sup>13</sup>C and <sup>15</sup>N chemical  
422 shifts were subsequently referenced using the <sup>13</sup>C/<sup>1</sup>H and <sup>15</sup>N/<sup>1</sup>H ratios as described  
423 previously<sup>60</sup>.

424 ***NMR relaxation experiments.*** Protein was used at ~180 μM with 2.5 mM liposomes (100 nm  
425 diameter). TCEP was added fresh (to 1mM) to sample prior to data collection. NMR size  
426 exclusion buffer [20 mM HEPES (pH 6.8), 100 mM NaCl, 1 mM TCEP]. <sup>15</sup>N-R<sub>2</sub> experiments  
427 were collected with a recycle time of 2.6 s and 16 scans per FID and <sup>15</sup>N{<sup>1</sup>H}-NOE experiments  
428 were collected with a saturation pulse of 4 s and an additional relaxation delay of 5 s and 32  
429 scans per FID. <sup>15</sup>N-R<sub>2</sub> relaxation delays of 16.96 (×2), 33.92, 67.84, 101.76 (×2), 135.68, 169.6  
430 (×2), 203.52 and 237.44 ms were used. The repeated spectra were used to estimate instrumental  
431 error. <sup>15</sup>N relaxation parameters were determined using the program *relax* (version 3.3.4)<sup>61</sup>. For  
432 R<sub>2</sub> rate constants, errors were estimated using 500 Monte Carlo Simulations. The steady state  
433 <sup>15</sup>N{<sup>1</sup>H}-NOE values for mouse MLKL<sub>(1-158)</sub> were estimated from the ratios of peak intensities  
434 obtained from spectra acquired with and without proton saturation using *relax*. Errors for  
435 <sup>15</sup>N{<sup>1</sup>H}-NOE experiment were calculated based on noise level in the spectrum.

436  
437 ***Reagents and antibodies.*** Primary antibodies used in this study for immunoblotting were: rat  
438 anti-mouse MLKL (WEHI clone 5A6; produced in-house and soon available from Millipore  
439 as MABC1634; 1:2000)<sup>49</sup>; rabbit anti-phospho-S345 mouse MLKL (Cell Signaling  
440 Technology; clone D6E3G; 1:2000); rat anti-mouse RIPK3 (WEHI clone 8G7; produced in-  
441 house<sup>7</sup> and soon available from Millipore as MABC1595; 1:2000); rabbit anti-phospho-  
442 T231/S232 mouse RIPK3 (Genentech; clone GEN135-35-9<sup>62</sup>; lot PUR73907; 1:2000); rabbit  
443 anti-mouse or human RIPK1 (Cell Signaling Technology; clone D94C12; 1:2000); and mouse  
444 anti-Actin (A1978, Sigma-Aldrich, St Louis, MO, USA; 1:5000). Secondary antibodies used

445 in this study were: horseradish peroxidase (HRP)-conjugated goat anti-rat IgG (Southern  
446 Biotech 3010-05), HRP-conjugated goat anti-mouse IgG (Southern Biotech 1010-05), and  
447 HRP-conjugated goat anti-rabbit IgG (Southern Biotech 4010-05). All secondary antibodies  
448 were used at a dilution of 1:10000. Recombinant hTNF-Fc, produced in-house, and the Smac-  
449 mimetic, Compound A, have been previously described<sup>63, 64</sup>. The pan-caspase inhibitor, IDN-  
450 6556/emricasan, was provided by Tetralogic Pharmaceuticals.

451

452 **Cell culture.** *Mlkl*<sup>-/-</sup> MDF cells were cultured in Dulbecco's Modified Eagle Medium (DMEM;  
453 Gibco) supplemented with 8% (v/v) Fetal Calf Serum (FCS; Sigma), penicillin (100 U mL<sup>-1</sup>),  
454 streptomycin (100 µg mL<sup>-1</sup>). Puromycin (2.5 µg mL<sup>-1</sup>; StemCell Technologies) was added for  
455 lines stably transduced with inducible mouse MLKL constructs. Routine testing confirmed cell  
456 lines to be mycoplasma-negative.

457

458 **IncuCyte cell death assays.** *Mlkl*<sup>-/-</sup> MDF cells were seeded into 96-well plates at 8 x10<sup>4</sup>  
459 cells/well and left to adhere for 4-5 h prior to treatment with doxycycline (20 ng mL<sup>-1</sup>)  
460 overnight to induce expression of the relevant full-length mouse MLKL constructs. Cells were  
461 then treated with necroptotic stimulus comprising, TNF (100 ng mL<sup>-1</sup>), the Smac-mimetic  
462 compound A (500 nM) and the pan-caspase inhibitor IDN-6556 (10 µM) (TSI) to induce  
463 necroptosis in FluoroBrite DMEM media (ThermoFisher Scientific) supplemented with 1%  
464 FCS, 1 mM Na pyruvate (ThermoFisher Scientific), 1 mM L-GlutaMAX (ThermoFisher  
465 Scientific), SYTOX Green nucleic acid stain (ThermoFisher Scientific, 1:20000) and SPY620  
466 live cell DNA stain (Spirochrome, 1:1000). Cells were then imaged using the IncuCyte S3  
467 System (Essen Bioscience) with default bright-field, red and green channel settings on 10x  
468 objective. Scans were obtained every 30 min for 5 h, where percent cell death was quantified  
469 based upon the number of SYTOX Green-positive cells per image over the number of SPY620-  
470 positive cells per image using IncuCyte S3 v2018A software (Essen Bioscience). Data were  
471 plotted as mean ± SEM from three biologically independent *Mlkl*<sup>-/-</sup> MDF cell lines (*n* = 6 to 9).

472

473 **Immunoblot.** *Mlkl*<sup>-/-</sup> MDF cells were seeded into 24-well plates at 7 x10<sup>4</sup> cells/well and left to  
474 adhere for 4-5 h. Cells were induced overnight with doxycycline (20 ng mL<sup>-1</sup>) and then treated  
475 with TNF (100 ng mL<sup>-1</sup>), Smac-mimetic (Compound A; 500 nM) and pan-caspase inhibitor,  
476 IDN-6556 (5 µM) (TSI) for 1.5 or 3.0 h. Cells were lysed in ice-cold RIPA buffer [10 mM Tris-  
477 HCl pH 8.0, 1 mM EGTA, 2 mM MgCl<sub>2</sub>, 0.5% v/v Triton X100, 0.1% w/v Na deoxycholate,



478 0.5% w/v SDS and 90 mM NaCl] supplemented with 1x Protease & Phosphatase Inhibitor  
479 Cocktail (Roche) and 100 U/mL Denarase (c-LEcta). Whole-cell lysates were boiled at 100 °C  
480 for 10-15 min in 1 × SDS Laemmli lysis buffer (126 mM Tris-HCl, pH 8, 20% v/v glycerol,  
481 4% w/v SDS, 0.02% w/v bromophenol blue, 5% v/v 2-mercaptoethanol), and then resolved by  
482 4 to 15% Tris-Glycine gel (Bio-Rad). Proteins were transferred to PVDF membrane, blocked  
483 with 5% w/v skim milk powder in TBST and then probed overnight with primary antibodies  
484 (as per *Reagents and antibodies* above). The signals were revealed by enhanced  
485 chemiluminescence on a ChemiDoc Touch Imaging System (BioRad) using an appropriate  
486 HRP-conjugated secondary antibody (as per *Reagents and antibodies* above). Before probing  
487 different proteins with primary antibody, membranes were incubated in mild stripping buffer  
488 [200 mM glycine pH 2.9, 1% w/v SDS, 0.5 mM TCEP] for 30 min at room temperature then  
489 re-blocked.

490

491 ***Lactate Dehydrogenase (LDH) release.*** Colorimetric LDH release assay kit (Promega G1780)  
492 was performed according to manufacturer's instructions. Data are plotted as mean ± SD of  
493 three independent replicates.

494

495 ***Liposome preparation.*** Large Unilamellar Vesicles (LUVs) were prepared using a plasma  
496 membrane-like lipid mix ([Supplementary Table 4](#)) and resuspended in chloroform as a 20 mg  
497 mL<sup>-1</sup> (~25 mM for most lipids) stock as previously reported<sup>29,37</sup>. Dried lipids were resuspended  
498 in either 500 µL of LUV buffer [10 mM HEPES pH 7.5, 135 mM KCl] with 50 mM 5(6)-  
499 Carboxyfluorescein dye (Sigma) to form dye filled liposomes for permeabilization assays or  
500 NMR size exclusion buffer [20 mM HEPES (pH 6.8), 100 mM NaCl, 1 mM TCEP] for NMR  
501 studies. The mixture was then freeze-thawed at least 5×, by immersion in liquid nitrogen until  
502 fully frozen, followed by immersion in a 37 °C water bath until contents had thawed. The lipid  
503 mixture was extruded through polycarbonate membranes of 100 nm size cut-off (Avanti Polar  
504 Lipids, AL, USA), a minimum of 21 times to form liposomes, using a pre-warmed mini  
505 extruder (Avanti Polar Lipids, AL, USA). Liposomes stocks were at approximately 2.5 mM  
506 lipid concentration and were stored at 4 °C in the dark.

507

508 ***Liposome dye release assays.*** Recombinant mouse MLKL<sub>(1-158)</sub> protein was diluted to 16 µM  
509 (2× desired final concentration) in LUV buffer, and 50 µL aliquoted into adjacent wells of a  
510 96 well Flat-bottom plate (ThermoFisher Scientific). Prior to use, the liposomes (100 nm  
511 diameter filled with 5(6)-Carboxyfluorescein dye) were purified from excess dye using a PD-

512 10 desalting column (Cytiva) and diluted to 20  $\mu$ M in LUV buffer. At the plate reader (Hidex  
513 Chameleon Multilabel Microplate Reader; Lab Logic), the protocol was pre-programmed,  
514 before 50  $\mu$ L of liposomes was promptly added to each well of the 96 well plate using a multi-  
515 channel pipette. The plate was then immediately placed in the plate reader and measurements  
516 started. Fluorescence was measured every 2 min for 60 minutes (31 measurements) at 20 °C  
517 with excitation wavelength of 485 nm and emission wavelength of 535 nm. 100% dye release  
518 was determined by the incubation of liposomes with 50  $\mu$ L of 1% CHAPS detergent in LUV  
519 buffer, while a baseline was determined by the incubation of liposomes with 50  $\mu$ L of LUV  
520 buffer alone. All assays were performed in triplicate. Data were plotted as mean  $\pm$  SEM of  
521 three independent assays and data is presented as a percentage of maximum dye release.

522 **REFERENCES**

- 523 1. Cho YS, Challa S, Moquin D, Genga R, Ray TD, Guildford M, *et al.* Phosphorylation-  
524 driven assembly of the RIP1-RIP3 complex regulates programmed necrosis and virus-  
525 induced inflammation. *Cell* 2009, **137**(6): 1112-1123.  
526
- 527 2. Fletcher-Etherington A, Nobre L, Nightingale K, Antrobus R, Nichols J, Davison AJ,  
528 *et al.* Human cytomegalovirus protein pUL36: A dual cell death pathway inhibitor.  
529 *Proc Natl Acad Sci U S A* 2020, **117**(31): 18771-18779.  
530
- 531 3. Kitur K, Wachtel S, Brown A, Wickersham M, Paulino F, Penaloza HF, *et al.*  
532 Necroptosis Promotes Staphylococcus aureus Clearance by Inhibiting Excessive  
533 Inflammatory Signaling. *Cell reports* 2016, **16**(8): 2219-2230.  
534
- 535 4. Liu Z, Nailwal H, Rector J, Rahman MM, Sam R, McFadden G, *et al.* A class of viral  
536 inducer of degradation of the necroptosis adaptor RIPK3 regulates virus-induced  
537 inflammation. *Immunity* 2021, **54**(2): 247-258 e247.  
538
- 539 5. Pearson JS, Giogha C, Muhlen S, Nachbur U, Pham CL, Zhang Y, *et al.* EspL is a  
540 bacterial cysteine protease effector that cleaves RHIM proteins to block necroptosis and  
541 inflammation. *Nat Microbiol* 2017, **2**: 16258.  
542
- 543 6. Pearson JS, Murphy JM. Down the rabbit hole: Is necroptosis truly an innate response  
544 to infection? *Cell Microbiol* 2017, **19**(8): e12750.  
545
- 546 7. Petrie EJ, Sandow JJ, Lehmann WIL, Liang LY, Coursier D, Young SN, *et al.* Viral  
547 MLKL Homologs Subvert Necroptotic Cell Death by Sequestering Cellular RIPK3.  
548 *Cell reports* 2019, **28**(13): 3309-3319 e3305.  
549
- 550 8. Steain M, Baker M, Pham CLL, Shanmugam N, Gambin Y, Sierrecki E, *et al.* Varicella  
551 zoster virus encodes a viral decoy RHIM to inhibit cell death. *PLoS Pathog* 2020, **16**(7):  
552 e1008473.  
553
- 554 9. Upton JW, Kaiser WJ, Mocarski ES. DAI/ZBP1/DLM-1 complexes with RIP3 to  
555 mediate virus-induced programmed necrosis that is targeted by murine  
556 cytomegalovirus vIRA. *Cell Host Microbe* 2012, **11**(3): 290-297.  
557
- 558 10. Hildebrand JM, Kauppi M, Majewski IJ, Liu Z, Cox AJ, Miyake S, *et al.* A missense  
559 mutation in the MLKL brace region promotes lethal neonatal inflammation and  
560 hematopoietic dysfunction. *Nat Commun* 2020, **11**(1): 3150.  
561
- 562 11. Muller T, Dewitz C, Schmitz J, Schroder AS, Brasen JH, Stockwell BR, *et al.*  
563 Necroptosis and ferroptosis are alternative cell death pathways that operate in acute  
564 kidney failure. *Cell Mol Life Sci* 2017, **74**(19): 3631-3645.  
565
- 566 12. Newton K, Dugger DL, Maltzman A, Greve JM, Hedehus M, Martin-McNulty B, *et al.*  
567 RIPK3 deficiency or catalytically inactive RIPK1 provides greater benefit than MLKL  
568 deficiency in mouse models of inflammation and tissue injury. *Cell Death Differ* 2016,  
569 **23**(9): 1565-1576.  
570



- 571 13. Pefanis A, Ierino FL, Murphy JM, Cowan PJ. Regulated necrosis in kidney ischemia-  
572 reperfusion injury. *Kidney Int* 2019, **96**(2): 291-301.  
573
- 574 14. Pierdomenico M, Negroni A, Stronati L, Vitali R, Prete E, Bertin J, *et al.* Necroptosis  
575 is active in children with inflammatory bowel disease and contributes to heighten  
576 intestinal inflammation. *Am J Gastroenterol* 2014, **109**(2): 279-287.  
577
- 578 15. Rickard JA, Anderton H, Etemadi N, Nachbur U, Darding M, Peltzer N, *et al.* TNFR1-  
579 dependent cell death drives inflammation in Sharpin-deficient mice. *Elife* 2014, **3**:  
580 e03464.  
581
- 582 16. Rickard JA, O'Donnell JA, Evans JM, Lalaoui N, Poh AR, Rogers TW, *et al.* RIPK1  
583 regulates RIPK3-MLKL driven systemic inflammation and emergency hematopoiesis.  
584 *Cell* 2014, **157**(2): 1175-1188.  
585
- 586 17. Dannappel M, Vlantis K, Kumari S, Polykratis A, Kim C, Wachsmuth L, *et al.* RIPK1  
587 maintains epithelial homeostasis by inhibiting apoptosis and necroptosis. *Nature* 2014,  
588 **513**(7516): 90-94.  
589
- 590 18. Samson AL, Garnish SE, Hildebrand JM, Murphy JM. Location, location, location: a  
591 compartmentalized view of necroptotic signaling. *Sci Signal* 2021, **14**: eabc6178.  
592
- 593 19. Cook WD, Moujalled DM, Ralph TJ, Lock P, Young SN, Murphy JM, *et al.* RIPK1-  
594 and RIPK3-induced cell death mode is determined by target availability. *Cell Death*  
595 *Differ* 2014, **21**(10): 1600-1612.  
596
- 597 20. He S, Wang L, Miao L, Wang T, Du F, Zhao L, *et al.* Receptor interacting protein  
598 kinase-3 determines cellular necrotic response to TNF-alpha. *Cell* 2009, **137**(6): 1100-  
599 1111.  
600
- 601 21. Meng Y, Sandow JJ, Czabotar PE, Murphy JM. The regulation of necroptosis by post-  
602 translational modifications. *Cell Death Differ* 2021, doi: **10.1038/s41418-020-00722-**  
603 **7**.  
604
- 605 22. Orozco S, Yatim N, Werner MR, Tran H, Gunja SY, Tait SW, *et al.* RIPK1 both  
606 positively and negatively regulates RIPK3 oligomerization and necroptosis. *Cell Death*  
607 *Differ* 2014, **21**(10): 1511-1521.  
608
- 609 23. Murphy JM, Czabotar PE, Hildebrand JM, Lucet IS, Zhang JG, Alvarez-Diaz S, *et al.*  
610 The pseudokinase MLKL mediates necroptosis via a molecular switch mechanism.  
611 *Immunity* 2013, **39**(3): 443-453.  
612
- 613 24. Sun L, Wang H, Wang Z, He S, Chen S, Liao D, *et al.* Mixed lineage kinase domain-  
614 like protein mediates necrosis signaling downstream of RIP3 kinase. *Cell* 2012, **148**(1-  
615 2): 213-227.  
616
- 617 25. Garnish SE, Meng Y, Koide A, Sandow JJ, Denbaum E, Jacobsen AV, *et al.*  
618 Conformational interconversion of MLKL and disengagement from RIPK3 precede  
619 cell death by necroptosis. *Nat Commun* 2021, **12**(1): 2211.  
620

- 621 26. Petrie EJ, Czabotar PE, Murphy JM. The Structural Basis of Necroptotic Cell Death  
622 Signaling. *Trends Biochem Sci* 2019, **44**(1): 53-63.  
623
- 624 27. Samson AL, Zhang Y, Geoghegan ND, Gavin XJ, Davies KA, Mlodzianoski MJ, *et al.*  
625 MLKL trafficking and accumulation at the plasma membrane control the kinetics and  
626 threshold for necroptosis. *Nat Commun* 2020, **11**(1): 3151.  
627
- 628 28. Hildebrand JM, Tanzer MC, Lucet IS, Young SN, Spall SK, Sharma P, *et al.* Activation  
629 of the pseudokinase MLKL unleashes the four-helix bundle domain to induce  
630 membrane localization and necroptotic cell death. *Proc Natl Acad Sci U S A* 2014,  
631 **111**(42): 15072-15077.  
632
- 633 29. Petrie EJ, Sandow JJ, Jacobsen AV, Smith BJ, Griffin MDW, Lucet IS, *et al.*  
634 Conformational switching of the pseudokinase domain promotes human MLKL  
635 tetramerization and cell death by necroptosis. *Nat Commun* 2018, **9**(1): 2422.  
636
- 637 30. Petrie EJ, Birkinshaw RW, Koide A, Denbaum E, Hildebrand JM, Garnish SE, *et al.*  
638 Identification of MLKL membrane translocation as a checkpoint in necroptotic cell  
639 death using Monobodies. *Proc Natl Acad Sci U S A* 2020, **117**(15): 8468-8475.  
640
- 641 31. Petrie EJ, Hildebrand JM, Murphy JM. Insane in the membrane: a structural perspective  
642 of MLKL function in necroptosis. *Immunol Cell Biol* 2017, **95**(2): 152-159.  
643
- 644 32. Murai S, Yamaguchi Y, Shirasaki Y, Yamagishi M, Shindo R, Hildebrand JM, *et al.* A  
645 FRET biosensor for necroptosis uncovers two different modes of the release of  
646 DAMPs. *Nat Commun* 2018, **9**(1): 4457.  
647
- 648 33. Davies KA, Fitzgibbon C, Young SN, Garnish SE, Yeung W, Coursier D, *et al.* Distinct  
649 pseudokinase domain conformations underlie divergent activation mechanisms among  
650 vertebrate MLKL orthologues. *Nat Commun* 2020, **11**(1): 3060.  
651
- 652 34. Murphy JM, Lucet IS, Hildebrand JM, Tanzer MC, Young SN, Sharma P, *et al.* Insights  
653 into the evolution of divergent nucleotide-binding mechanisms among pseudokinases  
654 revealed by crystal structures of human and mouse MLKL. *The Biochemical journal*  
655 2014, **457**(3): 369-377.  
656
- 657 35. Xie T, Peng W, Yan C, Wu J, Gong X, Shi Y. Structural Insights into RIP3-Mediated  
658 Necroptotic Signaling. *Cell reports* 2013, **5**(1): 70-78.  
659
- 660 36. Davies KA, Tanzer MC, Griffin MDW, Mok YF, Young SN, Qin R, *et al.* The brace  
661 helices of MLKL mediate interdomain communication and oligomerisation to regulate  
662 cell death by necroptosis. *Cell Death Differ* 2018, **25**(9): 1567-1580.  
663
- 664 37. Tanzer MC, Matti I, Hildebrand JM, Young SN, Wardak A, Tripaydonis A, *et al.*  
665 Evolutionary divergence of the necroptosis effector MLKL. *Cell Death Differ* 2016,  
666 **23**(7): 1185-1197.  
667
- 668 38. Rodriguez DA, Weinlich R, Brown S, Guy C, Fitzgerald P, Dillon CP, *et al.*  
669 Characterization of RIPK3-mediated phosphorylation of the activation loop of MLKL  
670 during necroptosis. *Cell Death Differ* 2016, **23**(1): 76-88.

- 671  
672 39. Tanzer MC, Tripaydonis A, Webb AI, Young SN, Varghese LN, Hall C, *et al.*  
673 Necroptosis signalling is tuned by phosphorylation of MLKL residues outside the  
674 pseudokinase domain activation loop. *The Biochemical journal* 2015, **471**(2): 255-265.  
675  
676 40. Dovey CM, Diep J, Clarke BP, Hale AT, McNamara DE, Guo H, *et al.* MLKL Requires  
677 the Inositol Phosphate Code to Execute Necroptosis. *Mol Cell* 2018, **70**(5): 936-948  
678 e937.  
679  
680 41. McNamara DE, Dovey CM, Hale AT, Quarato G, Grace CR, Guibao CD, *et al.* Direct  
681 Activation of Human MLKL by a Select Repertoire of Inositol Phosphate Metabolites.  
682 *Cell Chem Biol* 2019.  
683  
684 42. Quarato G, Guy CS, Grace CR, Llambi F, Nourse A, Rodriguez DA, *et al.* Sequential  
685 Engagement of Distinct MLKL Phosphatidylinositol-Binding Sites Executes  
686 Necroptosis. *Mol Cell* 2016, **61**(4): 589-601.  
687  
688 43. Su L, Quade B, Wang H, Sun L, Wang X, Rizo J. A plug release mechanism for  
689 membrane permeation by MLKL. *Structure* 2014, **22**(10): 1489-1500.  
690  
691 44. Newton K, Manning G. Necroptosis and Inflammation. *Annu Rev Biochem* 2016, **85**:  
692 743-763.  
693  
694 45. Murphy JM. The Killer Pseudokinase Mixed Lineage Kinase Domain-Like Protein  
695 (MLKL). *Cold Spring Harb Perspect Biol* 2020, **12**(8).  
696  
697 46. Kay LE, Torchia DA, Bax A. Backbone dynamics of proteins as studied by <sup>15</sup>N inverse  
698 detected heteronuclear NMR spectroscopy: application to staphylococcal nuclease.  
699 *Biochemistry* 1989, **28**(23): 8972-8979.  
700  
701 47. Dondelinger Y, Declercq W, Montessuit S, Roelandt R, Goncalves A, Bruggeman I, *et*  
702 *al.* MLKL compromises plasma membrane integrity by binding to phosphatidylinositol  
703 phosphates. *Cell reports* 2014, **7**(4): 971-981.  
704  
705 48. Brumatti G, Ma C, Lalaoui N, Nguyen NY, Navarro M, Tanzer MC, *et al.* The caspase-  
706 8 inhibitor emricasan combines with the SMAC mimetic birinapant to induce  
707 necroptosis and treat acute myeloid leukemia. *Sci Transl Med* 2016, **8**(339): 339ra369.  
708  
709 49. Samson AL, Fitzgibbon C, Patel KM, Hildebrand JM, Whitehead LW, Rimes JS, *et al.*  
710 A toolbox for imaging RIPK1, RIPK3, and MLKL in mouse and human cells. *Cell*  
711 *Death Differ* 2021, doi: **10.1038/s41418-021-00742-x**.  
712  
713 50. Wang H, Sun L, Su L, Rizo J, Liu L, Wang LF, *et al.* Mixed Lineage Kinase Domain-  
714 like Protein MLKL Causes Necrotic Membrane Disruption upon Phosphorylation by  
715 RIP3. *Mol Cell* 2014, **54**(1): 133-146.  
716  
717 51. Rubbelke M, Fiegen D, Bauer M, Binder F, Hamilton J, King J, *et al.* Locking mixed-  
718 lineage kinase domain-like protein in its auto-inhibited state prevents necroptosis. *Proc*  
719 *Natl Acad Sci U S A* 2020, **117**(52): 33272-33281.  
720

- 721 52. Mahdi LK, Huang M, Zhang X, Nakano RT, Kopp LB, Saur IML, *et al.* Discovery of  
722 a Family of Mixed Lineage Kinase Domain-like Proteins in Plants and Their Role in  
723 Innate Immune Signaling. *Cell Host Microbe* 2020, **28**(6): 813-824 e816.  
724
- 725 53. Murphy JM, Metcalf D, Young IG, Hilton DJ. A convenient method for preparation of  
726 an engineered mouse interleukin-3 analog with high solubility and wild-type  
727 bioactivity. *Growth Factors* 2010, **28**(2): 104-110.  
728
- 729 54. Hercus TR, Barry EF, Dottore M, McClure BJ, Webb AI, Lopez AF, *et al.* High yield  
730 production of a soluble human interleukin-3 variant from *E. coli* with wild-type  
731 bioactivity and improved radiolabeling properties. *PLoS One* 2013, **8**(8): e74376.  
732
- 733 55. Duff AP, Wilde KL, Rekas A, Lake V, Holden PJ. Robust high-yield methodologies  
734 for (2)H and (2)H/(15)N/(13)C labeling of proteins for structural investigations using  
735 neutron scattering and NMR. *Methods Enzymol* 2015, **565**: 3-25.  
736
- 737 56. Hyberts SG, Takeuchi K, Wagner G. Poisson-gap sampling and forward maximum  
738 entropy reconstruction for enhancing the resolution and sensitivity of protein NMR  
739 data. *J Am Chem Soc* 2010, **132**(7): 2145-2147.  
740
- 741 57. Kazimierczuk K, Orekhov VY. Accelerated NMR spectroscopy by using compressed  
742 sensing. *Angew Chem Int Ed Engl* 2011, **50**(24): 5556-5559.  
743
- 744 58. Delaglio F, Grzesiek S, Vuister GW, Zhu G, Pfeifer J, Bax A. NMRPipe: a  
745 multidimensional spectral processing system based on UNIX pipes. *J Biomol NMR*  
746 1995, **6**(3): 277-293.  
747
- 748 59. Lee W, Tonelli M, Markley JL. NMRFAM-SPARKY: enhanced software for  
749 biomolecular NMR spectroscopy. *Bioinformatics* 2015, **31**(8): 1325-1327.  
750
- 751 60. Wishart DS, Sykes BD. The <sup>13</sup>C chemical-shift index: a simple method for the  
752 identification of protein secondary structure using <sup>13</sup>C chemical-shift data. *J Biomol*  
753 *NMR* 1994, **4**(2): 171-180.  
754
- 755 61. Bieri M, d'Auvergne EJ, Gooley PR. relaxGUI: a new software for fast and simple  
756 NMR relaxation data analysis and calculation of ps-ns and μs motion of proteins. *J*  
757 *Biomol NMR* 2011, **50**(2): 147-155.  
758
- 759 62. Newton K, Wickliffe KE, Maltzman A, Dugger DL, Strasser A, Pham VC, *et al.* RIPK1  
760 inhibits ZBP1-driven necroptosis during development. *Nature* 2016, **540**(7631): 129-  
761 133.  
762
- 763 63. Bossen C, Ingold K, Tardivel A, Bodmer JL, Gaide O, Hertig S, *et al.* Interactions of  
764 tumor necrosis factor (TNF) and TNF receptor family members in the mouse and  
765 human. *J Biol Chem* 2006, **281**(20): 13964-13971.  
766
- 767 64. Vince JE, Wong WW, Khan N, Feltham R, Chau D, Ahmed AU, *et al.* IAP antagonists  
768 target cIAP1 to induce TNFalpha-dependent apoptosis. *Cell* 2007, **131**(4): 682-693.  
769  
770

771 **FIGURE LEGENDS**

772

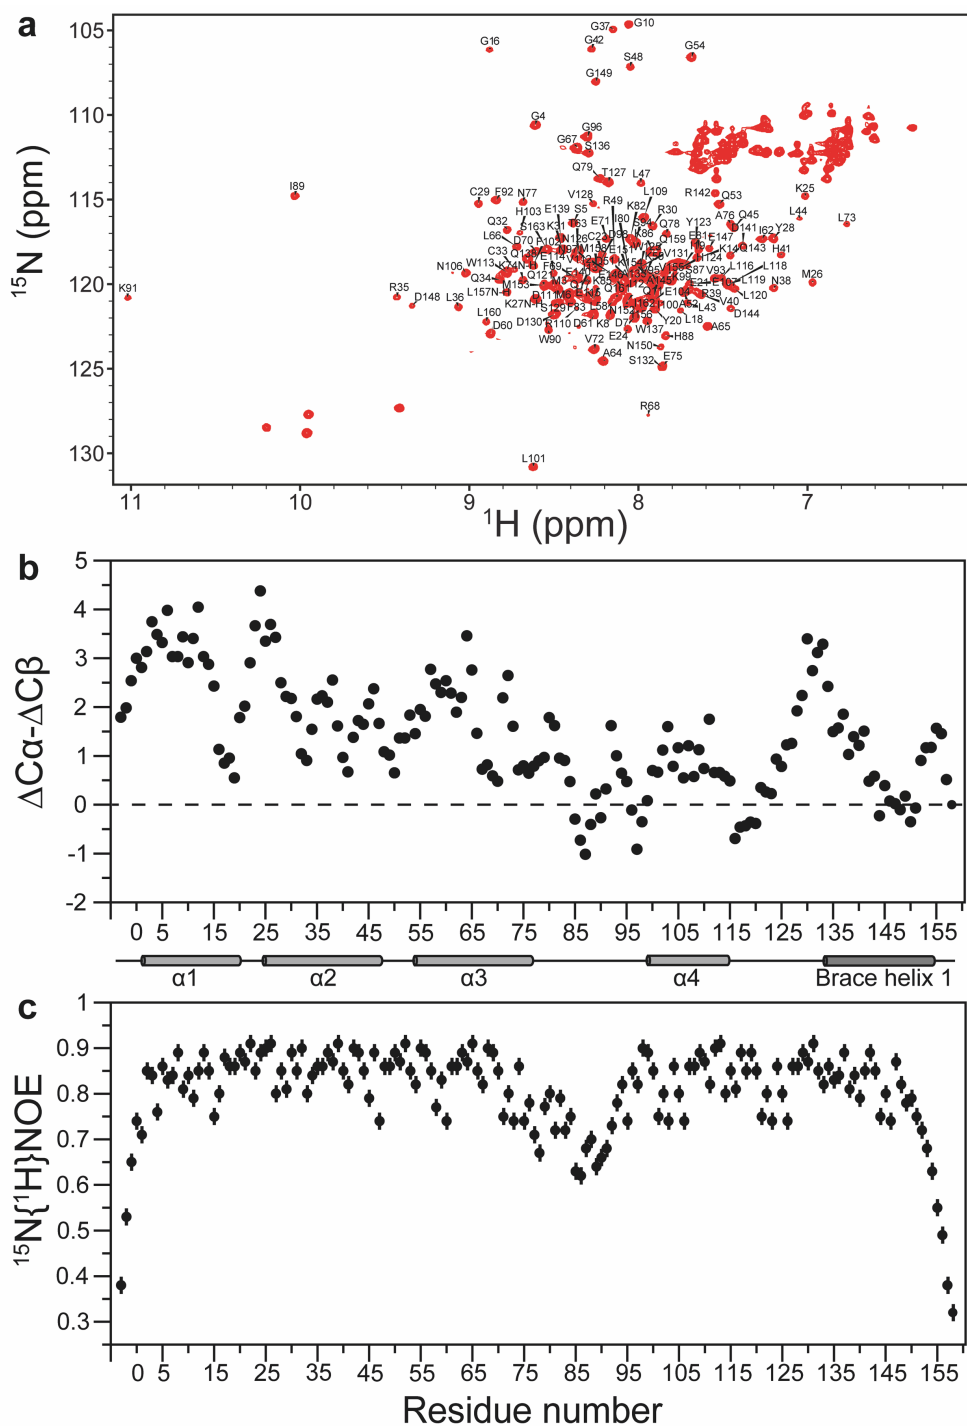

773

774 **Figure 1 | Mouse MLKL adopts a folded helical structure.** a) Full  $^1\text{H}$ ,  $^{15}\text{N}$  HSQC spectrum  
775 of mouse MLKL<sub>(1-158)</sub> with residue assignments. Unmarked resonances in the upper right  
776 corner belong to Asn and Gln sidechains and in the lower left corner belong to Trp-indole  
777 sidechains have not been assigned. The residues, GAMGS, are a cloning artifact and numbered  
778 -4 to 0, while residues M1-S158 are from mouse MLKL. b) Plots of  $^{13}\text{C}\alpha\beta$  secondary chemical

779 shifts and **c**) Steady state  $^{15}\text{N}\{^1\text{H}\}$ -NOEs for mouse MLKL<sub>(1-158)</sub> with error bars calculated  
780 based on average estimated noise level for  $^{15}\text{N}\{^1\text{H}\}$ -NOE. Experiments were conducted at pH  
781 6.8 and 25 °C. The helical secondary structure shown between panels **(b)** and **(c)** reflects that  
782 from the full-length mouse MLKL crystal structure (PDB, 4BTF)<sup>23</sup>.  
783



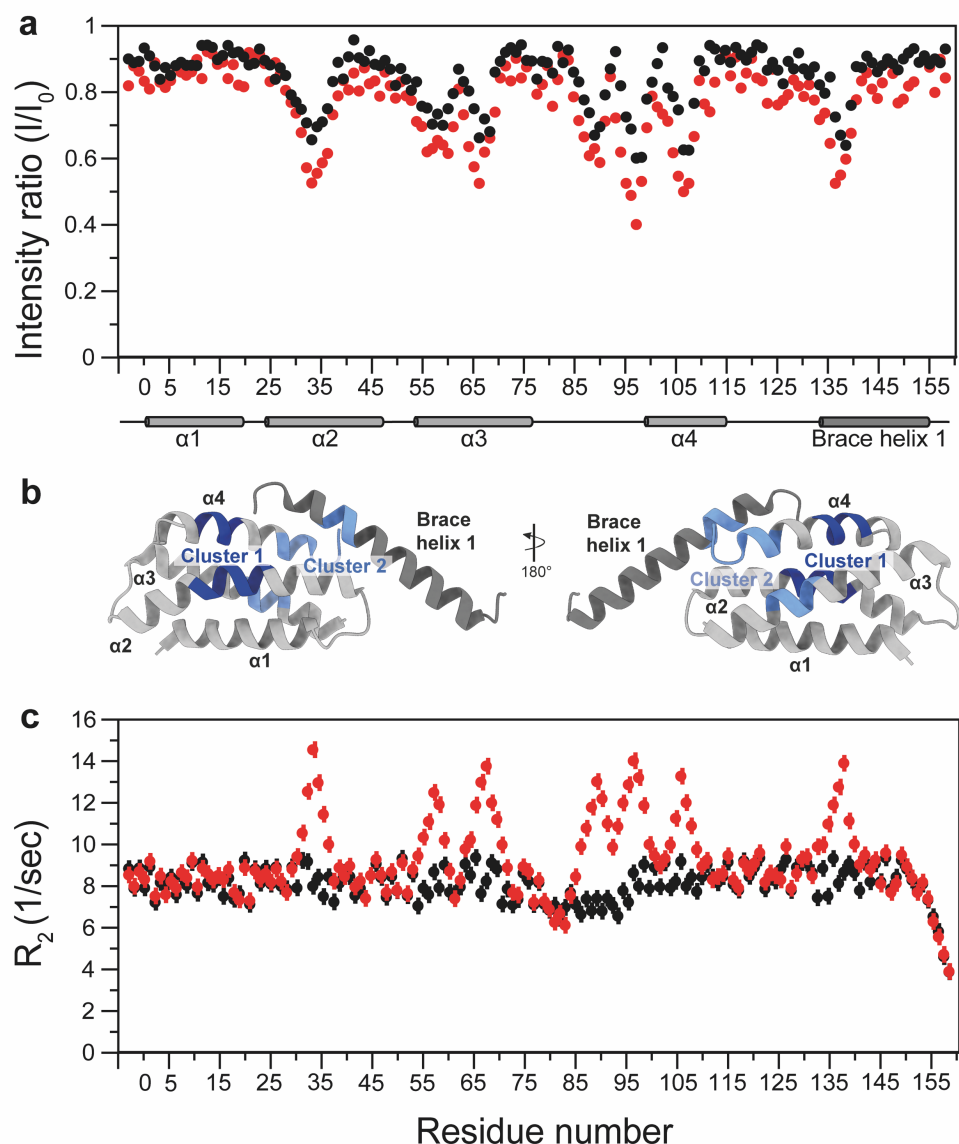

784

785 **Figure 2 | Two clusters of residues in mouse MLKL<sub>(1-158)</sub> mediate lipid binding.** Mouse

786 MLKL<sub>(1-158)</sub> binds to liposomes shown by titrating 100  $\mu\text{M}$   $^{15}\text{N}$ -labelled mouse MLKL<sub>(1-158)</sub>

787 with liposomes in the 1:0.5 (black circles) and 1:1 (red circles) ratio. **a)** Plot of change in  $^1\text{HN}$

788 and  $^{15}\text{N}$  peak intensity, where  $I$  is the intensity of the peak in the presence of liposome and  $I_0$

789 in the absence. The helical secondary structure shown between panels (a) and (b) reflects that

790 from the full-length mouse MLKL crystal structure (PDB, 4BTF)<sup>23</sup>. **b)** Clusters I (light blue)

791 and II (dark blue) of residues in mouse MLKL<sub>(1-158)</sub> that exhibited marked attenuation of peak

792 intensity are mapped onto the mouse MLKL crystal structure (PDB, 4BTF). **c)** Backbone  $^{15}\text{N}$

793 transverse relaxation rates ( $R_2$ ) measured at  $^{15}\text{N}$  frequency of 70.9 MHz, with liposomes in the

794 1:0.5 (black circles) and 1:1 (red circles) ratio. Error bars were calculated using Monte Carlo

795 Simulations for  $R_2$  measurement. Experiments in (a) and (c) were conducted at pH 6.8 and 25

796  $^{\circ}\text{C}$ .

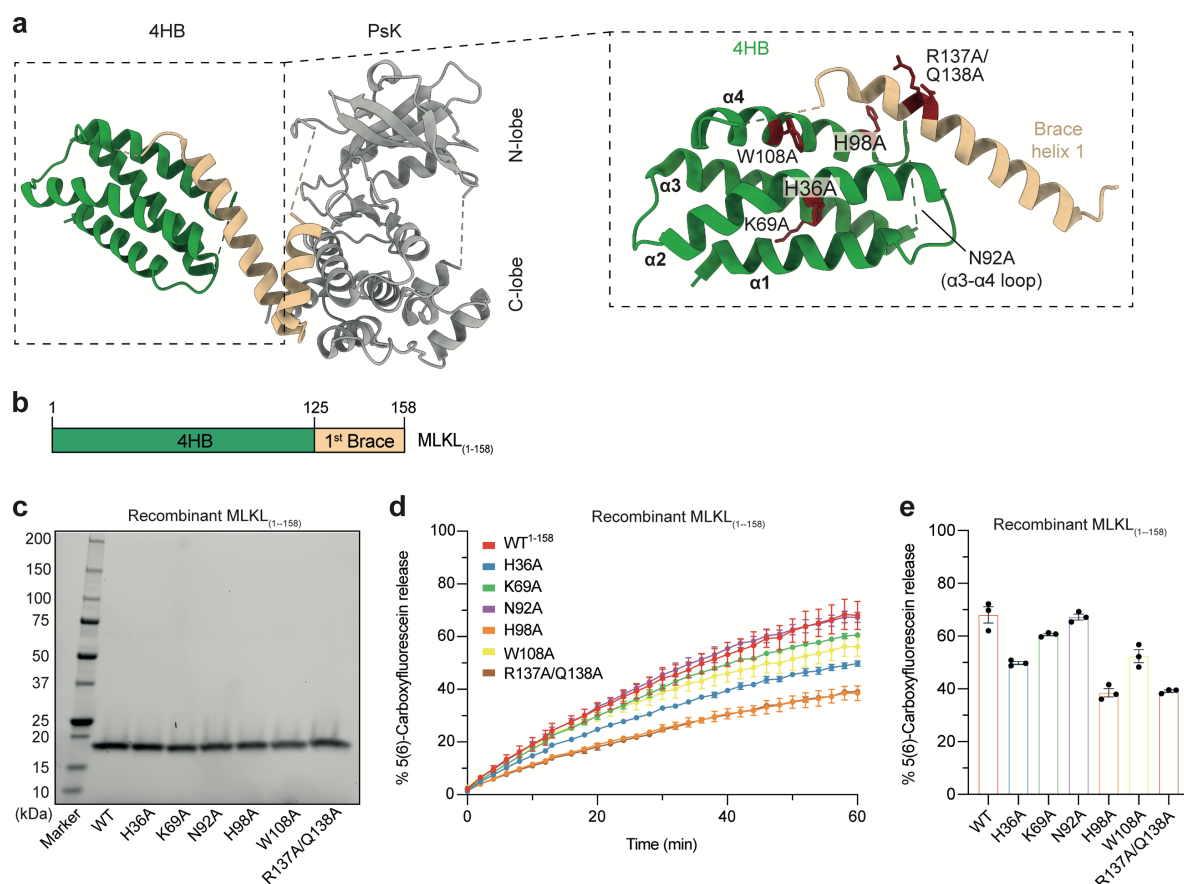

797

798 **Figure 3 | Liposome permeabilization assays validate lipid-interacting residues. a)**

799 full-length mouse MLKL crystal structure (PDB, 4BTF)<sup>23</sup>, comprising a 4HB (green), two-brace

800 helices (beige) and a bilobal pseudokinase (PsK) domain (grey). The surface-exposed residues

801 implicated to interact with lipids using NMR spectroscopy are shown as sticks and coloured

802 red (inset). Ala substitutions were introduced to each of these residues in MLKL<sub>(1-158)</sub>. **b)**

803 Architecture of mouse MLKL<sub>(1-158)</sub>. **c)** Reducing SDS-PAGE of all mouse MLKL<sub>(1-158)</sub> purified

804 constructs. Each purified recombinant protein construct was resolved by reducing SDS-PAGE

805 to assess purity. **d)** Liposome dye release assay using recombinant wild-type and mutant mouse

806 MLKL<sub>(1-158)</sub> at 8  $\mu$ M. Release of 5(6)-Carboxyfluorescein was monitored at 485 nm over 60

807 min. **e)** Evaluation of total dye release from wild-type and alanine substitution mutants of

808 mouse MLKL<sub>(1-158)</sub>. Data in **(d-e)** represent mean  $\pm$  SEM of three independent assays.

809



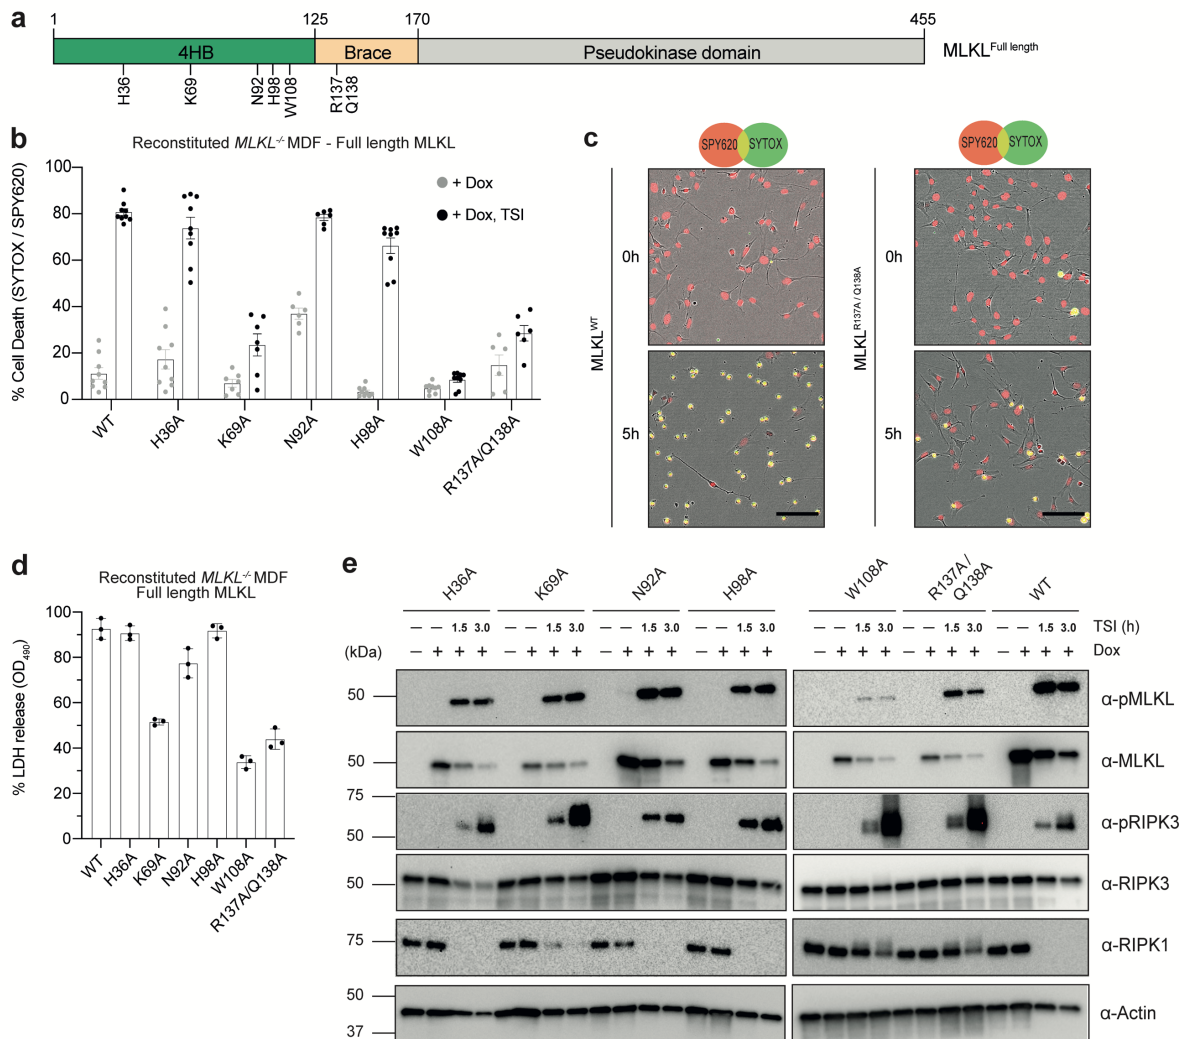

810

811 **Figure 4 | Mutation of lipid-binding residues in the 4HB and in the first brace compromise**

812 **necroptotic signaling.** **a)** Architecture of full-length mouse MLKL, with each Ala substitution

813 highlighted. **b)** Evaluation of necroptotic signaling for wild-type (WT) and alanine substitution

814 mutants of full-length mouse MLKL in MDF *Mkl1*<sup>-/-</sup> cells. WT or mutant mouse MLKL

815 expression was induced with doxycycline (Dox) and cell death was quantified using IncuCyte

816 S3 live cell imaging in the presence or absence of the necroptotic stimulus, TNF and Smac-

817 mimetic Compound A and pan-caspase inhibitor, IDN-6556, (TSI) for 5 h, by determining the

818 number SYTOX Green-positive cells (dead cells) relative to the number of SPY620-positive

819 cells (total cell confluency). Data represent mean ± SEM from three biologically independent

820 MDF *Mkl1*<sup>-/-</sup> cell lines (*n* = 6 to 9). **c)** Time-lapse micrographs of SPY620 uptake (SPY; red)

821 and SYTOX Green uptake (SYTOX; green) as indices of total cell confluency and cell death,

822 respectively. Both 0 and 5 h timepoints are shown post Dox induction and TSI treatment.

823 Micrographs are representative of *n* = 6-9 independent experiments using IncuCyte S3 live cell

824 imaging. Scale bar (black) represents 100 μm. **d)** Following induction with doxycycline and 3

825 h of TSI treatment, the extracellular release of lactate dehydrogenase (LDH) as an index of  
826 plasma membrane lysis (relative to detergent-treated cells) was measured by  
827 spectrophotometry at 490 nm. Data represent mean  $\pm$  SD of three independent experiments. e)  
828 *Mlkl*<sup>-/-</sup> MDF cells expressing WT and mutant full-length mouse MLKL following Dox  
829 induction were treated with the necroptotic stimulus, TSI, for 1.5 or 3 h. Whole cell-lysates  
830 were then fractionated by SDS-PAGE and probed by immunoblot for RIPK1, RIPK3, pRIPK3,  
831 MLKL and pMLKL with anti-actin as a loading control. Immunoblots are representative of  
832  $n = 2$  independent experiments.  
833

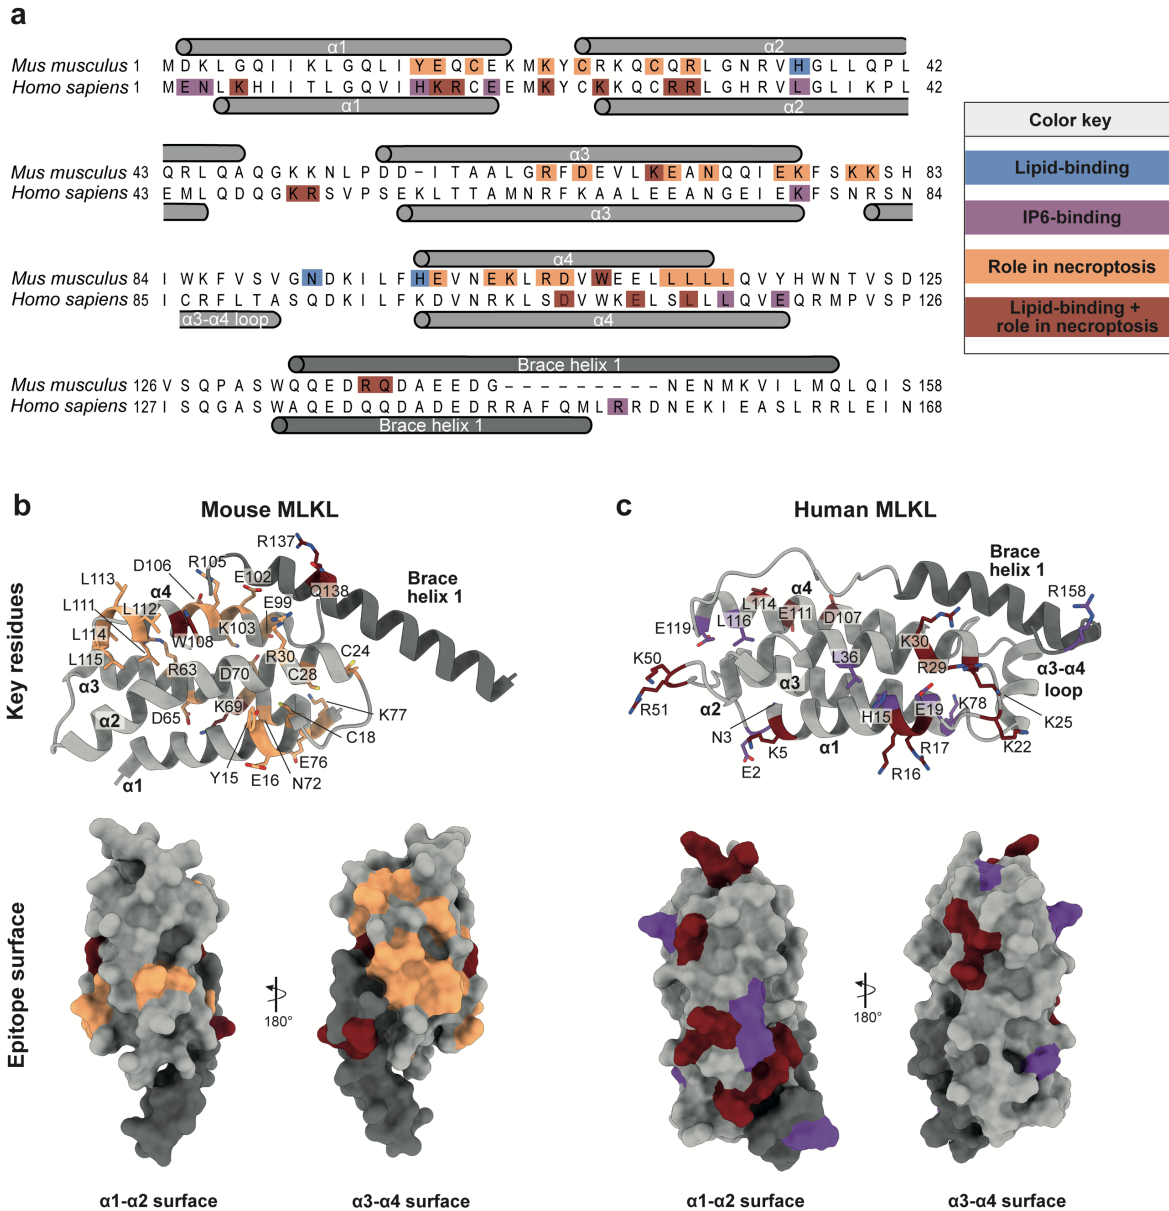

834

835 **Figure 5 | Membrane permeabilization is mediated by distinct epitopes in mouse and**

836 **human MLKL.** a) Sequence alignment of MLKL four-helix-bundle (4HB) + first brace helix

837 from mouse and human MLKL. Secondary structure from experimental structures of mouse<sup>23</sup>

838 and human<sup>43</sup> MLKL 4HB + brace helices are annotated above and below the sequences,

839 respectively. Residues in blue have been validated to bind lipids; residues in purple have been

840 validated to bind inositol hexaphosphate (IP6); residues in orange when mutated to alanine

841 exhibited deficits in cellular necroptotic signaling; and mutation of lipid-binding residues in

842 dark red exhibited deficits in cellular necroptotic signaling. b) Cartoon representation of mouse

843 MLKL 4HB (grey) + first brace (dark grey, Top panel) (PDB, 4BTF)<sup>23</sup>. Key residues (orange)

844 and lipid-binding residues (dark red) that exhibit deficits in cellular necroptotic signaling are

845 shown as sticks. The lower panel shows a representation of the mouse MLKL  $\alpha 1$ - $\alpha 2$  helix and

846  $\alpha$ 3- $\alpha$ 4 helix molecular surface, where each residue is color-coded as above. **c)** Cartoon  
847 representation of human MLKL 4HB (grey) + first brace (dark grey, Top panel) (PDB,  
848 2MSV)<sup>43</sup>. Key IP6-binding residues (purple) and lipid-binding residues (dark red) that exhibit  
849 deficits in cellular necroptotic signaling are shown as sticks. The lower panel shows a  
850 representation of the human MLKL  $\alpha$ 1- $\alpha$ 2 helix and  $\alpha$ 3- $\alpha$ 4 helix molecular surface, where  
851 each residue is color-coded as above. Between the surface representations in **(b)** and **(c)**, the  
852 different lipid-binding epitope for mouse and human MLKL can be observed.  
853
