# Supplementary material for: Membrane permeabilization is mediated by distinct epitopes in mouse and human orthologs of the necroptosis effector, MLKL
Source: bioRxiv or medRxiv preprint supplement (doi:10.1101/2021.05.03.442385), 2021-05-03
Supplement: Supplementary file [file media-1.pdf]

## SUPPLEMENTARY INFORMATION

### **Membrane permeabilization is mediated by distinct epitopes in mouse and human orthologs of the necroptosis effector, MLKL**

Ashish Sethi<sup>1,5</sup>, Christopher R. Horne<sup>2,3,5</sup>, Cheree Fitzgibbon<sup>2</sup>, Karyn Wilde<sup>4</sup>, Katherine A. Davies<sup>2,3</sup>, Sarah E. Garnish<sup>2,3</sup>, Annette V. Jacobsen<sup>2,3</sup>, André L. Samson<sup>2,3</sup>, Joanne M. Hildebrand<sup>2,3</sup>, Ahmad Wardak<sup>2</sup>, Peter E. Czabotar<sup>2,3</sup>, Emma J. Petrie<sup>2,3</sup>, Paul R. Gooley<sup>1</sup>, James M. Murphy<sup>2,3,\*</sup>

<sup>1</sup> Department of Biochemistry and Pharmacology, Bio21 Molecular Science and Biotechnology Institute, University of Melbourne, Parkville, VIC 3010, Australia

<sup>2</sup> Walter and Eliza Hall Institute of Medical Research, 1G Royal Parade, Parkville, VIC 3052, Australia

<sup>3</sup> Department of Medical Biology, University of Melbourne, Parkville, VIC 3052, Australia

<sup>4</sup> National Deuteration Facility, Australian Nuclear Science and Technology Organization, Lucas Heights, NSW 2234, Australia

<sup>5</sup> These authors contributed equally

\* Please address correspondence to JMM (jamesm@wehi.edu.au)

## SUPPLEMENTARY FIGURES

**Supplementary Figure 1 | Expression of wild-type and mutant mouse MLKL in *Mlkl*<sup>-/-</sup> MDF cells.** Following doxycycline (Dox) induction, whole cell-lysates were fractionated by SDS-PAGE and probed by immunoblot for MLKL with anti-actin as a loading control. Immunoblots are representative of  $n = 2$  independent experiments.

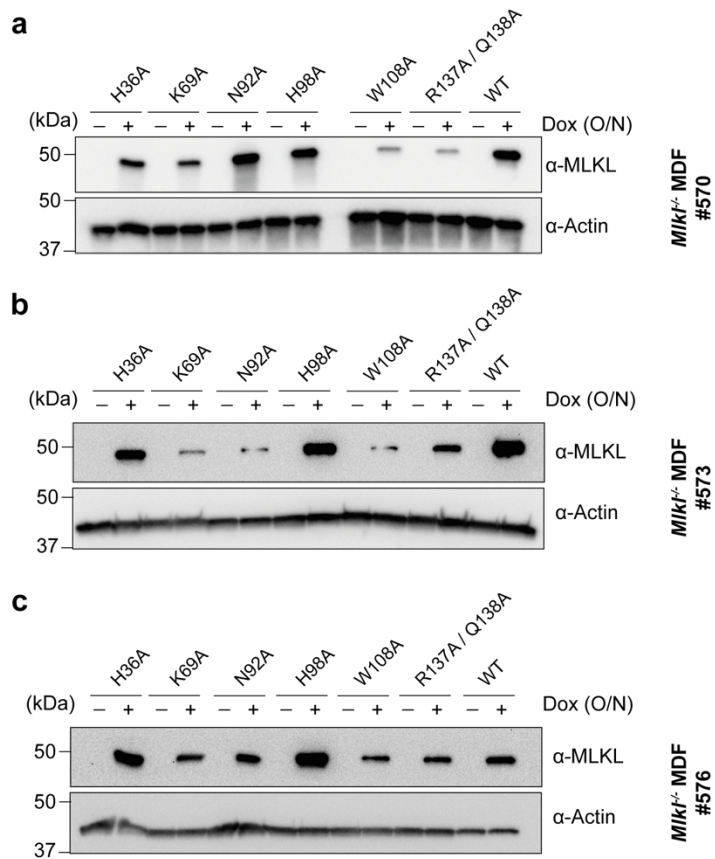

**Supplementary Figure 2 | Raw IncuCyte data of cell death mediated by wild-type and mutant mouse MLKL. a-f)** To establish the contribution of each lipid-binding residue in cellular necroptosis signaling, full-length wild-type (WT) and mutant mouse MLKL were stably introduced into *Mlkl*<sup>-/-</sup> MDF cells. Following doxycycline (Dox) treatment to induce expression, percent cell death was quantified using IncuCyte S3 live cell imaging in the presence or absence of the necroptotic stimulus, TNF and Smac-mimetic Compound A and pan-caspase inhibitor, IDN-6556, (TSI) for 5 h, by determining the number SYTOX Green-positive cells (dead cells) relative to the number of SPY620-positive cells (total cell confluency). The percent cell death of wild-type mouse MLKL is shown in each plot as a reference. Data represent mean ± SEM from three biologically independent *Mlkl*<sup>-/-</sup> MDF cell lines (*n* = 6 to 9).

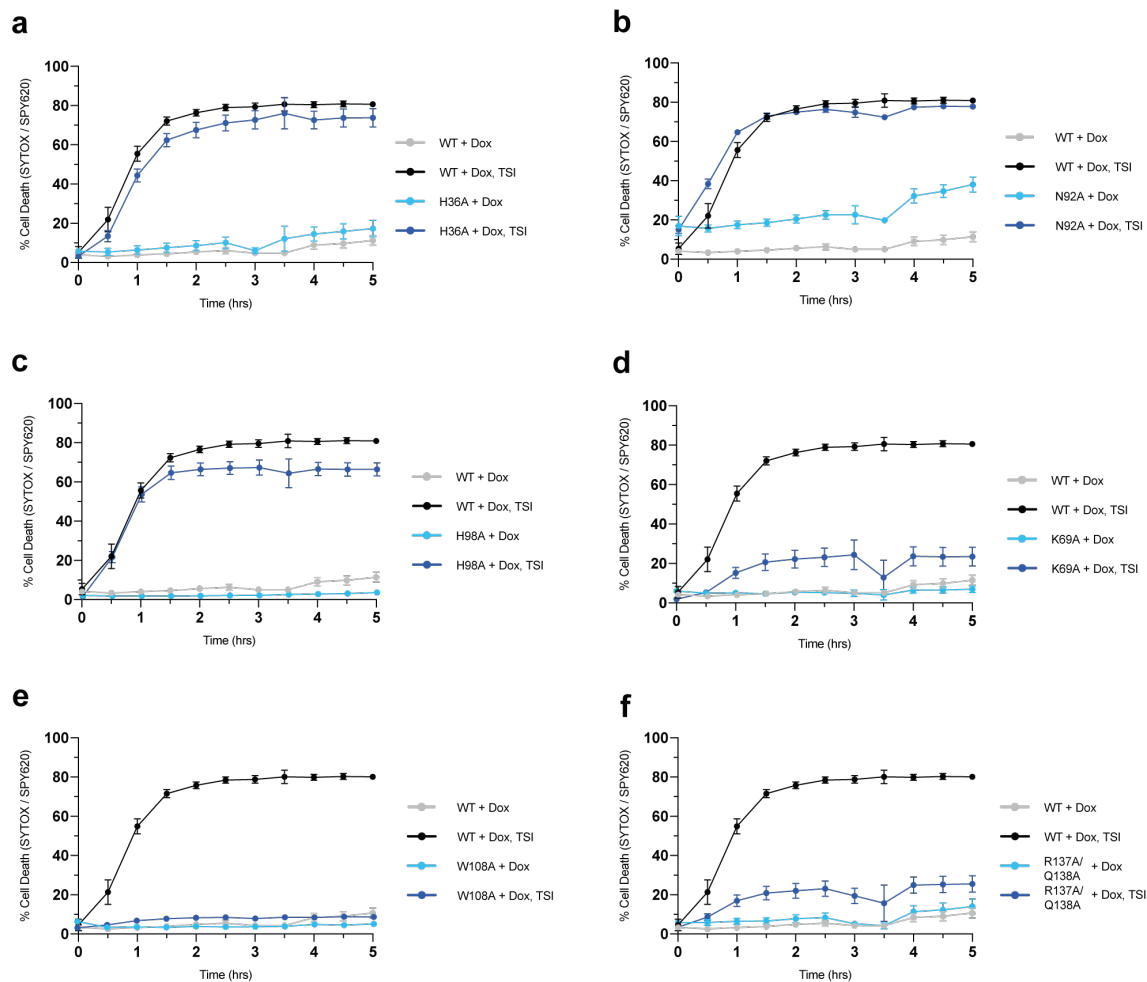

**SUPPLEMENTARY TABLES**

**Supplementary Table 1 | Summary of wild-type and mutant mouse MLKL properties**

| <b>MLKL mutation</b>               | <b>Location of mutation</b> | <b>Lipid-binding<br/>(Impact on liposome permeabilization)</b> | <b>Necroptotic<br/>signalling function</b> |
|------------------------------------|-----------------------------|----------------------------------------------------------------|--------------------------------------------|
| mMLKL WT                           |                             |                                                                | +                                          |
| mMLKL Y15A/E16A                    | α1 helix                    | N/D                                                            | - <sup>1</sup>                             |
| mMLKL C18A/C24A/C28A               | α1/2 helix                  | N/D                                                            | - <sup>1</sup>                             |
| mMLKL K22A/R30A                    | α2 helix and preceding loop | N/D                                                            | - <sup>1</sup>                             |
| mMLKL H36A                         | α2 helix                    | Yes (compromised)                                              | + <sup>†</sup>                             |
| mMLKL R63A/D65A                    | α3 helix                    | N/D                                                            | - <sup>1</sup>                             |
| mMLKL K69A                         | α3 helix                    | Yes (compromised)                                              | Reduced <sup>†</sup>                       |
| mMLKL E70A/N72A                    | α3 helix                    | N/D                                                            | - <sup>1</sup>                             |
| mMLKL E76A/K77A                    | α3 helix                    | N/D                                                            | - <sup>1</sup>                             |
| mMLKL K80A/K81A                    | α3-α4 loop                  | N/D                                                            | - <sup>1</sup>                             |
| mMLKL N92A                         | α3-α4 loop                  | Yes (comparable to WT)                                         | + <sup>†</sup>                             |
| mMLKL H98A                         | α4 helix                    | Yes (compromised)                                              | + <sup>†</sup>                             |
| mMLKL H98A/E99A                    | α4 helix                    | N/D                                                            | - <sup>1</sup>                             |
| mMLKL E102A/K103A                  | α4 helix                    | N/D                                                            | - <sup>1</sup>                             |
| mMLKL R105A/D106A                  | α4 helix                    | N/D                                                            | - <sup>1,2</sup>                           |
| mMLKL W108A                        | α4 helix                    | Yes (compromised)                                              | - <sup>†</sup>                             |
| mMLKL E109A/E110A                  | α4 helix                    | N/D                                                            | - <sup>1,2</sup>                           |
| mMLKL LLLL <sup>112-115</sup> AAAA | α4 helix                    | N/D                                                            | - <sup>1</sup>                             |
| mMLKL R137A/Q138A                  | First brace helix           | Yes (compromised)                                              | - <sup>†</sup>                             |

N/D = Not determined; - = loss-of-function; <sup>†</sup> This study

**Supplementary Table 2 | Summary of wild-type and mutant human MLKL properties**

| MLKL mutation     | Location of mutation                | Lipid- or IP6-interactor | Impact on liposome permeabilization | Necroptotic signalling function |
|-------------------|-------------------------------------|--------------------------|-------------------------------------|---------------------------------|
| hMLKL WT          |                                     |                          |                                     | +                               |
| hMLKL E2A/N3A     | $\alpha$ 1 helix                    | Lipid                    | Compromised                         | - <sup>3</sup>                  |
| hMLKL K5A         | $\alpha$ 1 helix                    | Lipid                    | Compromised                         | - <sup>3</sup>                  |
| hMLKL H15A        | $\alpha$ 1 helix                    | IP6                      | N/D                                 | N/D <sup>4</sup>                |
| hMLKL K16A/R17A   | $\alpha$ 1 helix                    | Lipid                    | Compromised                         | Reduced <sup>3, 5</sup>         |
| hMLKL E19A        | $\alpha$ 1 helix                    | IP6                      | N/D                                 | N/D <sup>6</sup>                |
| hMLKL K22Q/K25Q   | $\alpha$ 2 helix and preceding loop | Lipid                    | Compromised                         | - <sup>7</sup>                  |
| hMLKL R29E/R30E   | $\alpha$ 2 helix                    | Lipid                    | Compromised                         | - <sup>7</sup>                  |
| hMLKL L36A        | $\alpha$ 2 helix                    | IP6                      | N/D                                 | N/D <sup>6</sup>                |
| hMLKL K50A/K51A   | $\alpha$ 2- $\alpha$ 3 loop         | Lipid                    | Compromised                         | - <sup>3</sup>                  |
| hMLKL K78A        | $\alpha$ 3 helix                    | IP6                      | N/D                                 | N/D <sup>6</sup>                |
| hMLKL D107A/E111A | $\alpha$ 4 helix                    | Lipid                    | Compromised                         | - <sup>5, 8</sup>               |
| hMLKL L114A       | $\alpha$ 4 helix                    | Lipid                    | Compromised                         | - <sup>8</sup>                  |
| hMLKL L116A       | $\alpha$ 4 helix                    | IP6                      | N/D                                 | N/D <sup>6</sup>                |
| hMLKL E119A       | $\alpha$ 4 helix                    | IP6                      | N/D                                 | N/D <sup>6</sup>                |
| hMLKL R152A       | First brace helix                   | IP6                      | N/D                                 | N/D <sup>6</sup>                |

N/D = Not determined; - = loss-of-function

**Supplementary Table 3 | Primers used in this study**

| <b>Primer name</b>       | <b>Sequence</b>                            |
|--------------------------|--------------------------------------------|
| mMLKL Bam 5' fwd*        | 5'-CGCGGATCCatggataaattgggacagatcatc-3'    |
| mMLKL 158 stop EcoRI rev | 5'-CGCGAATTCAgctaattgcaactgcatcaggataac-3' |
| mMLKL 464 stop EcoRI rev | 5'-CGGAATTCttacaccttctgtccgtggattc-3'      |

\*Restriction sites underlined

**Supplementary Table 4 | Plasma membrane-like lipid mix for liposomes**

| <b>Lipid</b>                    | <b>Proportion of plasma membrane-like mix</b> | <b>Source</b>                               |
|---------------------------------|-----------------------------------------------|---------------------------------------------|
| Phosphatidylethanolamine (POPE) | 20%                                           | Avanti Polar Lipids<br>(Alabaster, AL, USA) |
| Phosphatidylcholine (POPC)      | 40%                                           |                                             |
| Phosphatidylinositol (PI)       | 10%                                           |                                             |
| Phosphatidylserine (DOPS)       | 20%                                           |                                             |
| Phosphatidylglycerol (POPG)     | 10%                                           |                                             |

## SUPPLEMENTARY REFERENCES

1. Hildebrand JM, Tanzer MC, Lucet IS, Young SN, Spall SK, Sharma P, *et al.* Activation of the pseudokinase MLKL unleashes the four-helix bundle domain to induce membrane localization and necroptotic cell death. *Proc Natl Acad Sci U S A* 2014, **111**(42): 15072-15077.
2. Tanzer MC, Matti I, Hildebrand JM, Young SN, Wardak A, Tripaydonis A, *et al.* Evolutionary divergence of the necroptosis effector MLKL. *Cell Death Differ* 2016, **23**(7): 1185-1197.
3. Quarato G, Guy CS, Grace CR, Llambi F, Nourse A, Rodriguez DA, *et al.* Sequential Engagement of Distinct MLKL Phosphatidylinositol-Binding Sites Executes Necroptosis. *Mol Cell* 2016, **61**(4): 589-601.
4. Dovey CM, Diep J, Clarke BP, Hale AT, McNamara DE, Guo H, *et al.* MLKL Requires the Inositol Phosphate Code to Execute Necroptosis. *Mol Cell* 2018, **70**(5): 936-948 e937.
5. Petrie EJ, Sandow JJ, Jacobsen AV, Smith BJ, Griffin MDW, Lucet IS, *et al.* Conformational switching of the pseudokinase domain promotes human MLKL tetramerization and cell death by necroptosis. *Nat Commun* 2018, **9**(1): 2422.
6. McNamara DE, Dovey CM, Hale AT, Quarato G, Grace CR, Guibao CD, *et al.* Direct Activation of Human MLKL by a Select Repertoire of Inositol Phosphate Metabolites. *Cell Chem Biol* 2019.
7. Su L, Quade B, Wang H, Sun L, Wang X, Rizo J. A plug release mechanism for membrane permeation by MLKL. *Structure* 2014, **22**(10): 1489-1500.
8. Petrie EJ, Birkinshaw RW, Koide A, Denbaum E, Hildebrand JM, Garnish SE, *et al.* Identification of MLKL membrane translocation as a checkpoint in necroptotic cell death using Monobodies. *Proc Natl Acad Sci U S A* 2020, **117**(15): 8468-8475.
